# Supplementary material for: A novel core–shell Pd(0)@enSiO2–Ni–TiO2 nanocomposite with a synergistic effect for efficient hydrogenations
Source: Royal Society of Chemistry journal article supplement (doi:10.1039/d2nj02845j), 2022-01-01
Supplement: d2nj02845j1.pdf [file d2nj02845j1.pdf]

## New Journal of Chemistry

### Supporting Information

#### A novel core-shell Pd(0)@enSiO<sub>2</sub>-Ni-TiO<sub>2</sub> nanocomposite with synergistic effect for efficient hydrogenations

Vrinda Sharma, Surbhi Sharma, Nitika Sharma, Sukanya Sharma and Satya Paul\*

Department of Chemistry, University of Jammu, Jammu 180006, India. Fax: +91-191-2431365; Tel: +91-191-2453969; Email: [paul7@rediffmail.com](mailto:paul7@rediffmail.com).

| List of contents                                                                         | Page No. |
|------------------------------------------------------------------------------------------|----------|
| 1. S1. Spectral details of the compounds listed in Table 4                               | 1-3      |
| 2. S2. Spectral details of the compounds listed in Table 5                               | 4-5      |
| 3. S3. <sup>1</sup> H NMR and <sup>13</sup> C NMR spectra of compounds listed in Table 4 | 6-25     |
| 4. S4. <sup>1</sup> H NMR and <sup>13</sup> C NMR spectra of compounds listed in Table 5 | 26-37    |

#### S1. Spectral details of compounds listed in Table 4

##### Aniline (2a)

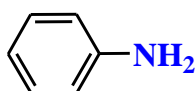

<sup>1</sup>H NMR (400 MHz, CDCl<sub>3</sub>): δ 3.68 (s, 2H, NH<sub>2</sub>), 6.77 (d, *J* = 8 Hz, 2H, ArH), 6.89 (t, *J* = 7.3 Hz, 1H, ArH), 7.28 (t, *J* = 7.3 Hz, 2H, ArH); <sup>13</sup>C NMR (100 MHz, CDCl<sub>3</sub>): δ 115.24, 118.76, 129.43, 146.59.

##### 4-Methylaniline (2b)

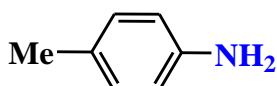

<sup>1</sup>H NMR (400 MHz, CDCl<sub>3</sub>): δ 2.28 (s, 3H, CH<sub>3</sub>), 3.49 (s, 2H, NH<sub>2</sub>), 6.65 (d, *J* = 8.2 Hz, 2H, ArH), 7.01 (d, *J* = 8.1 Hz, 2H, ArH); <sup>13</sup>C NMR (100 MHz, CDCl<sub>3</sub>): δ 20.50, 115.31, 127.84, 129.79, 143.82.

#### 4-Fluoroaniline(2c)

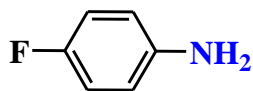

**<sup>1</sup>H NMR (400 MHz, CDCl<sub>3</sub>):** δ 3.60 (s, 2H, NH<sub>2</sub>), 6.62(dd, *J*= 8.6 Hz, 4.5 Hz, 2H, ArH), 6.89 (t, *J*= 8.0 Hz, 2H, ArH); **<sup>13</sup>C NMR (100 MHz, CDCl<sub>3</sub>):** δ 115.69 (d, *J*= 22.4 Hz), 116.10 (d, *J*= 7.6 Hz), 142.57 (d, *J*= 2.0 Hz), 156.38 (d, *J*= 235.2 Hz).

#### 4-Chloroaniline (2d)

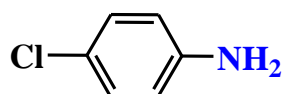

**<sup>1</sup>H NMR (400 MHz, CDCl<sub>3</sub>):** δ 3.68 (s, 2H, NH<sub>2</sub>), 6.63 (d, *J*= 8.4 Hz, 2H, ArH), 7.12 (d, *J*= 8.5 Hz, 2H, ArH); **<sup>13</sup>C NMR (100 MHz, CDCl<sub>3</sub>):** δ 116.25, 123.16, 129.13, 144.95.

#### 4-Bromoaniline (2e)

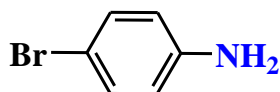

**<sup>1</sup>H NMR (400 MHz, CDCl<sub>3</sub>):** δ 3.69 (s, 2H, NH<sub>2</sub>), 6.59 (d, *J*= 8.7 Hz, 2H, ArH), 7.26 (d, *J*= 8.7 Hz, 2H, ArH); **<sup>13</sup>C NMR (100 MHz, CDCl<sub>3</sub>):** δ 110.22, 116.72, 132.02, 145.41.

#### 1,2-Diaminobenzene (2f)

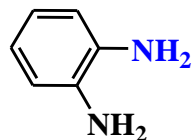

**<sup>1</sup>H NMR (400 MHz, DMSO):** δ 4.38 (s, 4H, NH<sub>2</sub>), 6.36-6.48 (m, 2H, ArH), 6.49-6.52 (m, 2H, ArH); **<sup>13</sup>C NMR (100 MHz, DMSO):** δ 114.98, 117.73, 135.39.

### 1,3-Diaminobenzene (2g)

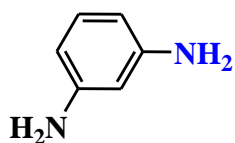

$^1\text{H NMR}$  (400 MHz,  $\text{CDCl}_3$ ):  $\delta$  3.55 (bs, 4H,  $\text{NH}_2$ ), 6.05 (s, 1H, ArH), 6.18 (d,  $J=8.5$  Hz, 2H, ArH), 6.95 (t,  $J=7.7$  Hz, 1H, ArH);  $^{13}\text{C NMR}$  (100 MHz,  $\text{CDCl}_3$ ):  $\delta$  103.22, 106.79, 132.07, 149.19.

### 1,4-Diaminobenzene (2h)

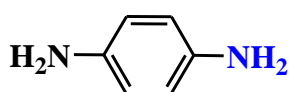

$^1\text{H NMR}$  (400 MHz,  $\text{CDCl}_3$ ):  $\delta$  3.23 (bs, 4H,  $\text{NH}_2$ ), 6.60 (s, 4H, ArH);  $^{13}\text{C NMR}$  (100 MHz,  $\text{CDCl}_3$ ):  $\delta$  116.74, 138.59.

### 2-Aminobenzylalcohol (2i)

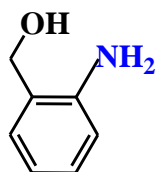

$^1\text{H NMR}$  (400 MHz, DMSO):  $\delta$  3.36 (s, 2H,  $\text{NH}_2$ ), 4.37 (d,  $J=5.4$  Hz, 2H,  $\text{CH}_2$ ), 4.99 (t,  $J=5.4$  Hz, 1H, OH), 6.51 (td,  $J=7.3$  Hz, 1.0 Hz, 1H, ArH), 6.61 (d,  $J=7.9$  Hz, 0.9 Hz, 1H, ArH), 6.95 (td,  $J=7.7$  Hz, 1.5 Hz, 1H, ArH), 7.04 (d,  $J=7.4$  Hz, 1H, ArH);  $^{13}\text{C NMR}$  (100 MHz, DMSO):  $\delta$  61.60, 114.96, 116.22, 125.80, 128.07, 146.78.

### Quinoline (4a)

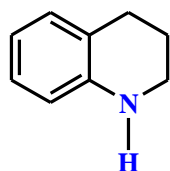

$^1\text{H NMR}$  (400 MHz,  $\text{CDCl}_3$ ):  $\delta$  1.94-2.00 (m, 2H,  $\text{CH}_2$ ), 2.79 (t,  $J=6.4$  Hz, 2H,  $\text{CH}_2$ ), 3.32 (t,  $J=6.5$  Hz, 2H,  $\text{CH}_2$ ), 6.50 (d,  $J=7.8$  Hz, 1H, ArH), 6.63 (t,  $J=7.3$  Hz, 1H, ArH), 6.96-7.00 (m, 2H, ArH);  $^{13}\text{C NMR}$  (100 MHz,  $\text{CDCl}_3$ ):  $\delta$  22.23, 27.29, 41.98, 114.20, 117.20, 121.57, 126.90, 129.92, 144.98.

## S2. Spectral details of compounds listed in Table 5

### 3-(4-Methoxyphenyl)-1-phenylpropan-1-one (6a)

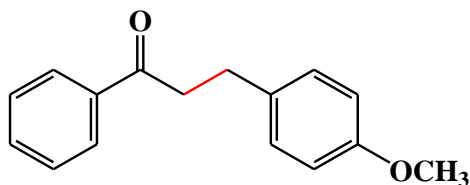

**<sup>1</sup>H NMR (400 MHz, CDCl<sub>3</sub>):** δ 3.04 (t, *J* = 7.7 Hz, 2H, CH<sub>2</sub>), 3.30 (t, *J* = 7.7 Hz, 2H, CH<sub>2</sub>), 3.81 (s, 3H, OCH<sub>3</sub>), 6.87 (d, *J* = 8.6 Hz, 2H, ArH), 7.20 (d, *J* = 8.6 Hz, 2H, ArH), 7.48 (t, *J* = 7.6 Hz, 2H, ArH), 7.58 (t, *J* = 7.9 Hz, 1H, ArH), 7.98 (d, *J* = 7.2 Hz, 2H, ArH); **<sup>13</sup>C NMR (100 MHz, CDCl<sub>3</sub>):** δ 29.28, 40.73, 55.29, 113.94, 128.12, 128.61, 129.42, 133.05, 133.39, 136.93, 158.23, 199.49.

### 3-(4-Methoxyphenyl)-1-(4-methylphenyl)propan-1-one (6b)

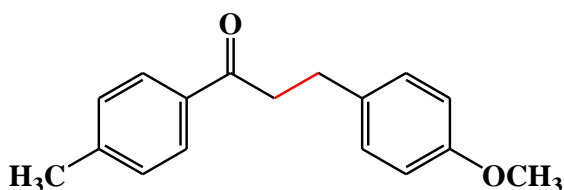

**<sup>1</sup>H NMR (400 MHz, CDCl<sub>3</sub>):** δ 2.43 (s, 3H, CH<sub>3</sub>), 3.02 (t, *J* = 7.7 Hz, 2H, CH<sub>2</sub>), 3.27 (t, *J* = 7.7 Hz, 2H, CH<sub>2</sub>), 3.81 (s, 3H, OCH<sub>3</sub>), 6.86 (d, *J* = 8.6 Hz, 2H, ArH), 7.19 (d, *J* = 8.5 Hz, 2H, ArH), 7.27 (d, *J* = 8 Hz, 2H, ArH), 7.88 (d, *J* = 8.2 Hz, 2H, ArH); **<sup>13</sup>C NMR (100 MHz, CDCl<sub>3</sub>):** δ 21.73, 29.65, 40.74, 55.29, 113.91, 128.18, 129.29, 129.37, 133.43, 134.40, 158.23, 199.21.

### 1-(4-Bromophenyl)-3-phenylpropan-1-one (6c)

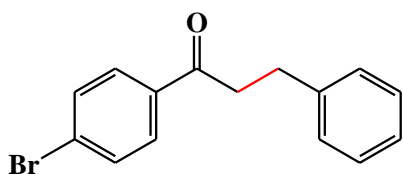

**<sup>1</sup>H NMR (400 MHz, CDCl<sub>3</sub>):** δ 3.10 (t, *J* = 4 Hz, 2H, CH<sub>2</sub>), 3.34 (t, *J* = 4 Hz, 2H, CH<sub>2</sub>), 7.22-7.61 (m, 7H, ArH), 7.99 (d, *J* = 4 Hz, 2H, ArH); **<sup>13</sup>C NMR (100 MHz, CDCl<sub>3</sub>):** δ 30.14, 40.47, 126.15, 128.05, 128.44, 128.54, 128.62, 133.08, 136.86, 141.30, 199.21.

### 1-(4-Methylphenyl)-3-phenylpropan-1-one (6d)

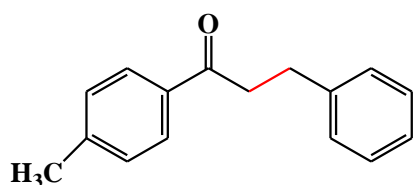

**$^1\text{H}$  NMR (400 MHz,  $\text{CDCl}_3$ ):**  $\delta$  2.44 (s, 3H,  $\text{CH}_3$ ), 3.10(t,  $J= 7.7$  Hz, 2H,  $\text{CH}_2$ ), 3.32 (t,  $J= 8$  Hz, 2H,  $\text{CH}_2$ ), 7.23-7.36(m, 7H, ArH), 7.90 (d,  $J= 8.1$  Hz, 2H, ArH);  **$^{13}\text{C}$  NMR (100 MHz,  $\text{CDCl}_3$ ):**  $\delta$  21.68, 30.32, 40.39, 126.14, 128.21, 128.47, 128.55, 129.32, 134.38, 141.47, 143.89, 198.98.

### 1,3-Diphenylpropan-1-one (6e)

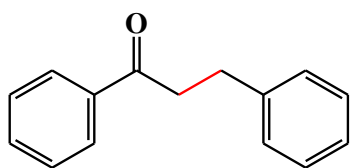

**$^1\text{H}$  NMR (400 MHz,  $\text{CDCl}_3$ ):**  $\delta$  3.10 (t,  $J= 7.7$  Hz, 2H,  $\text{CH}_2$ ), 3.34 (t,  $J= 7.7$  Hz, 2H,  $\text{CH}_2$ ), 7.22-7.35 (m, 5H, ArH), 7.48 (t,  $J= 7.6$  Hz, 2H, ArH), 7.59 (t,  $J=7.4$  Hz, 1H, ArH), 7.99 (d,  $J= 7.4$  Hz, 2H, ArH);  **$^{13}\text{C}$  NMR (100 MHz,  $\text{CDCl}_3$ ):**  $\delta$  30.13, 40.48, 126.15, 128.06, 128.45, 128.55, 128.64, 128.63, 133.10, 136.84, 141.30, 199.29.

### 3-(4-Chlorophenyl)-1-phenylpropan-1-one (6f)

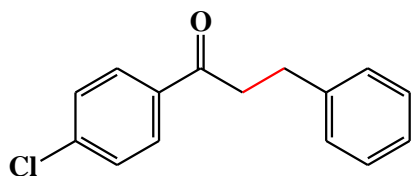

**$^1\text{H}$  NMR (400 MHz,  $\text{CDCl}_3$ ):**  $\delta$  3.06 (t,  $J= 8\text{Hz}$ , 2H,  $\text{CH}_2$ ), 3.20 (t,  $J= 8\text{Hz}$ , 2H,  $\text{CH}_2$ ), 7.20-7.61 (m, 7H, ArH), 7.97 (d,  $J= 8\text{Hz}$ , 2H, ArH);  **$^{13}\text{C}$  NMR (100 MHz,  $\text{CDCl}_3$ ):**  $\delta$  29.39, 40.13, 128.02, 128.61, 128.65, 129.83, 131.89, 133.16, 136.79, 139.75, 198.84.

S3.  $^1\text{H}$  NMR and  $^{13}\text{C}$  NMR spectra of compounds listed in **Table 4**

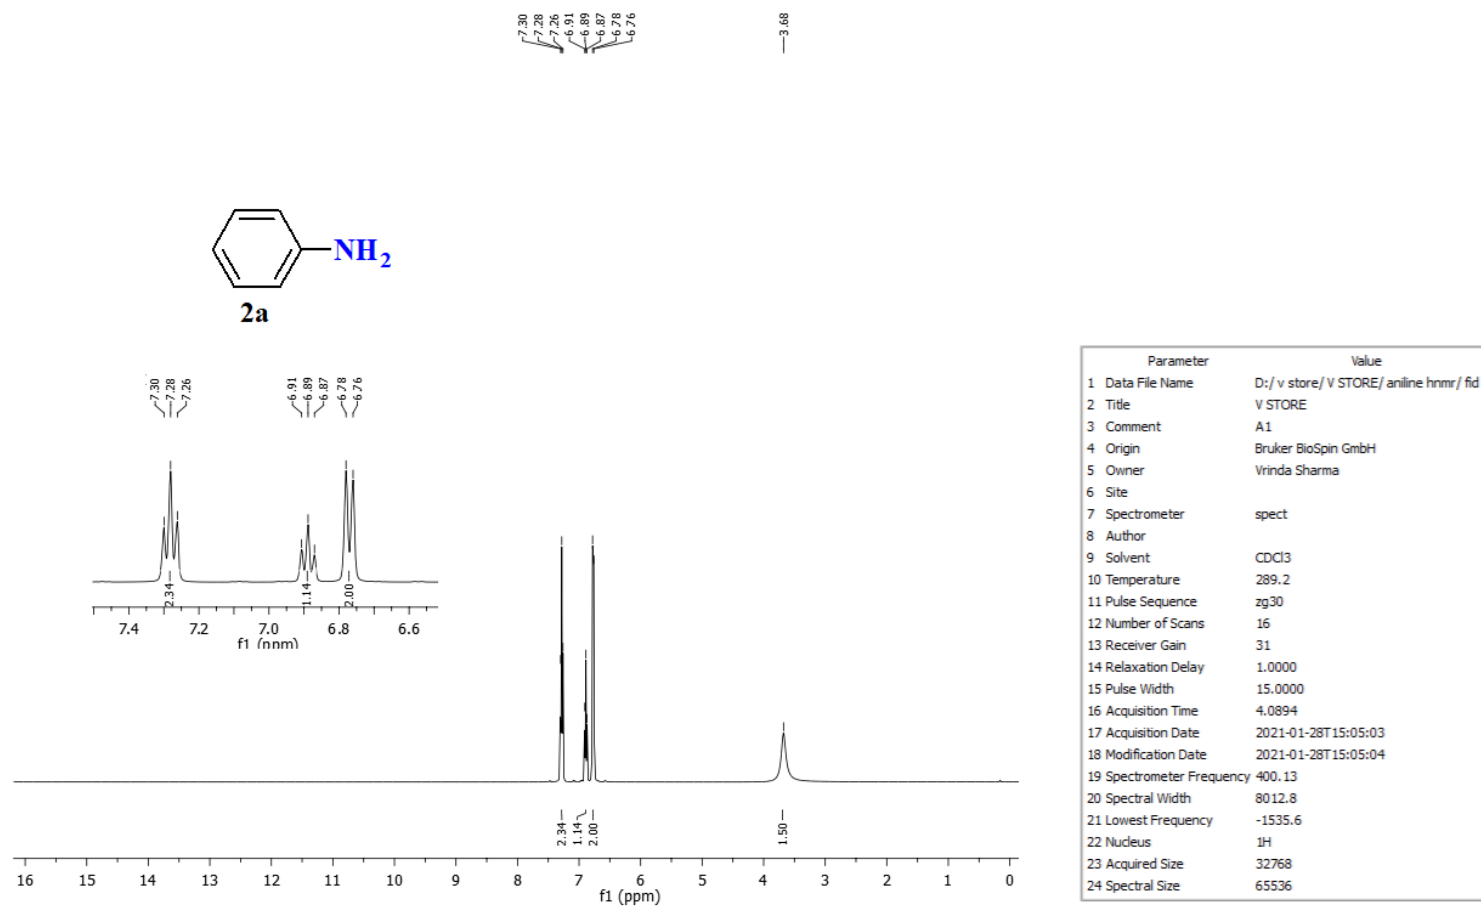

**Figure 1.**  $^1\text{H}$  NMR spectra of Aniline.

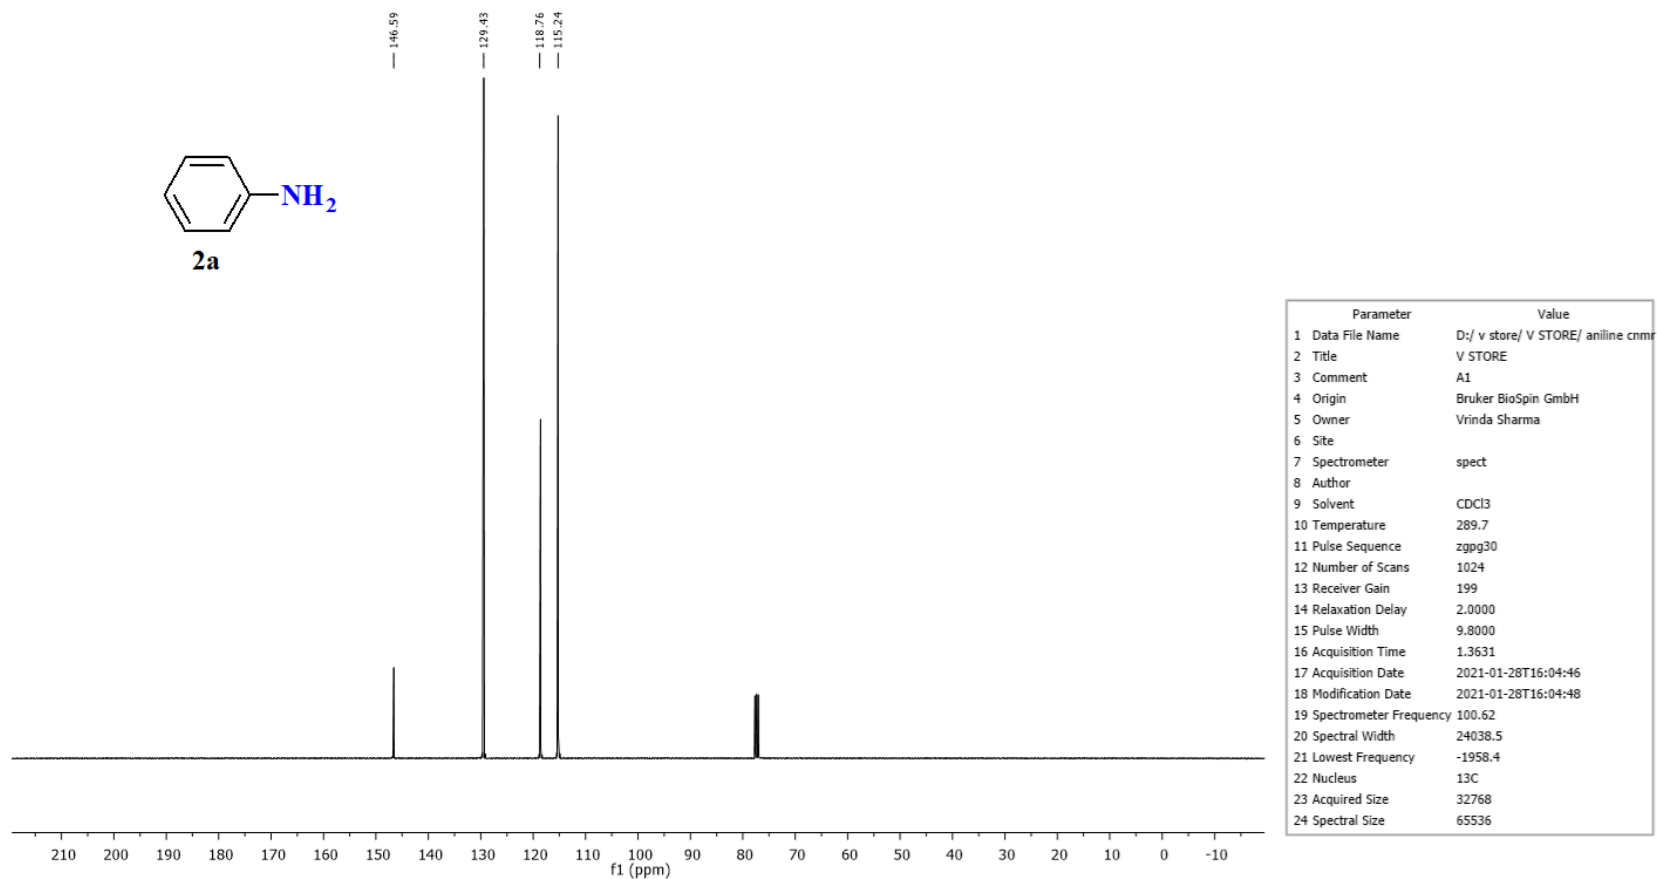

**Figure 2.** <sup>13</sup>C NMR spectra of Aniline.

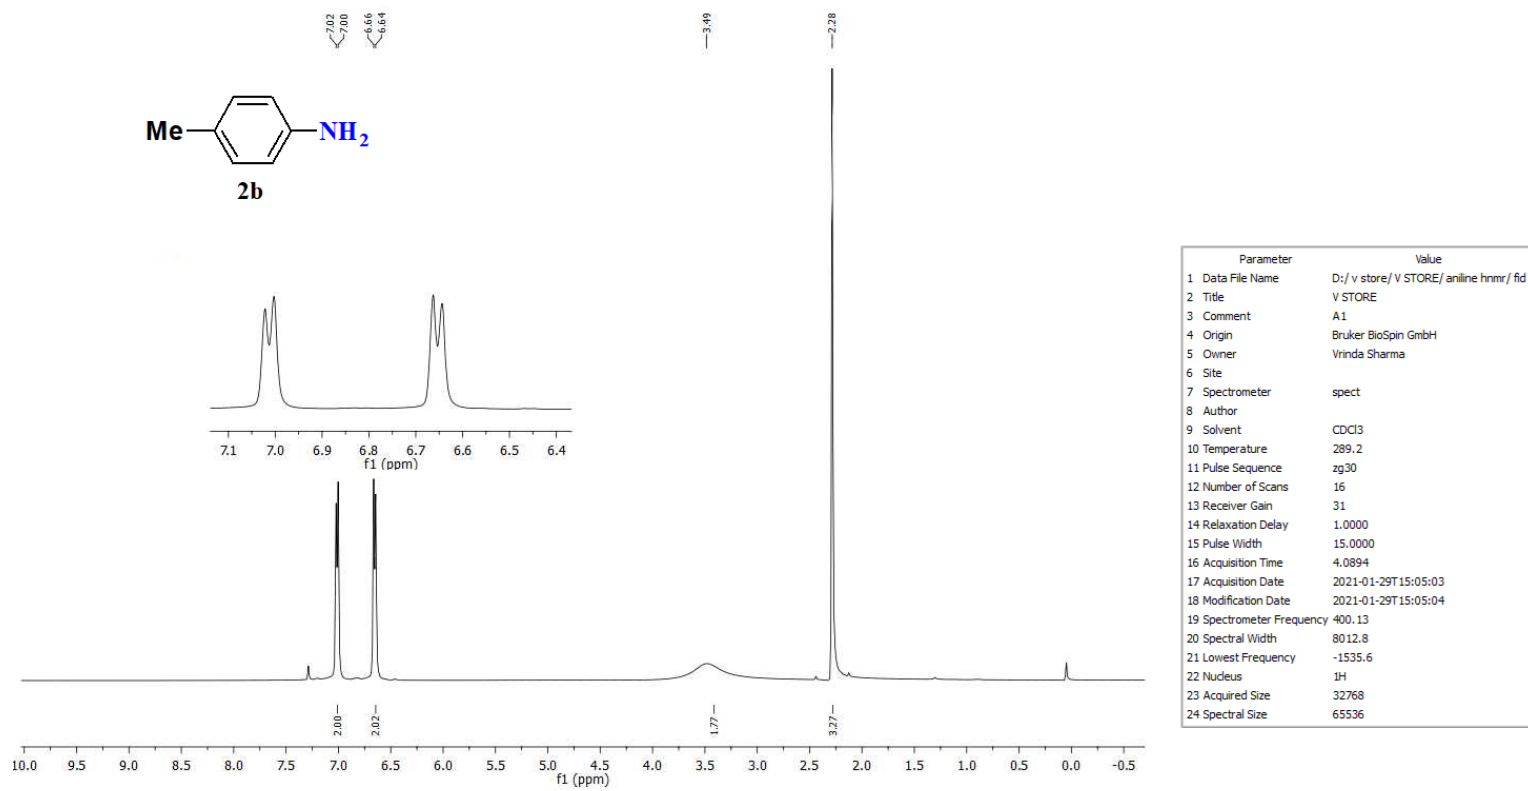

**Figure 3.** <sup>1</sup>H NMR spectra of 4-Methylaniline.



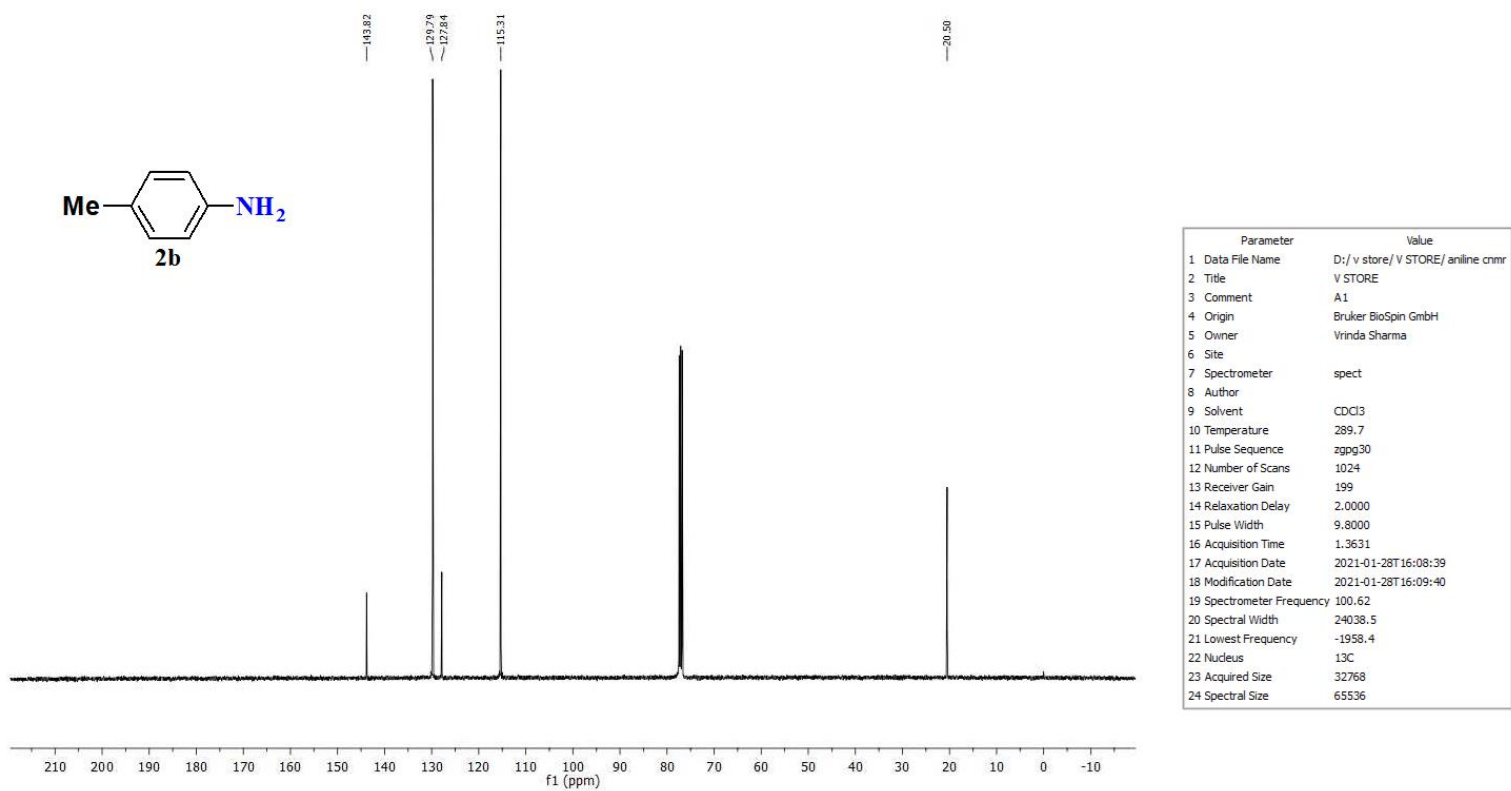

**Figure 4.**  $^{13}\text{C}$  NMR spectra of 4-Methylaniline.

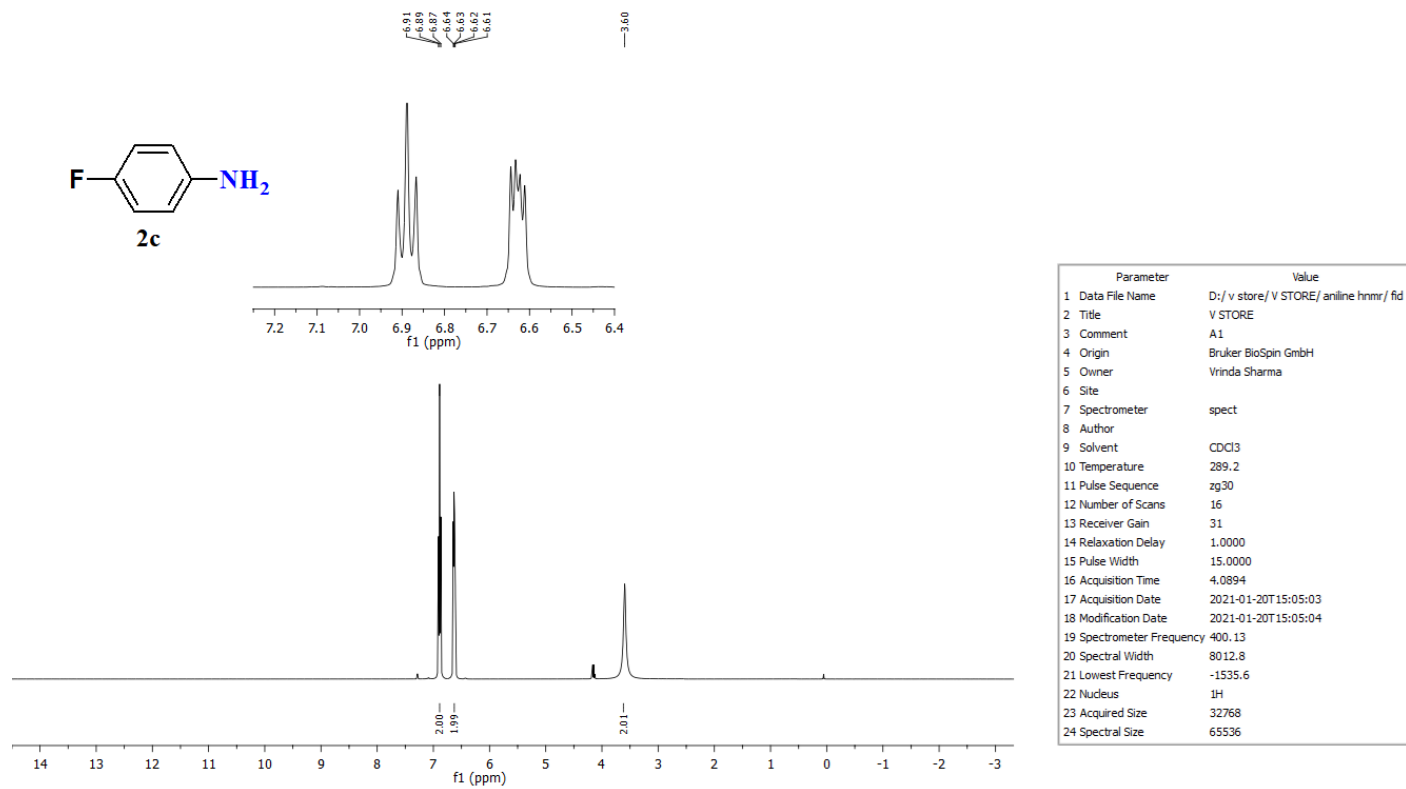

**Figure 5.** <sup>1</sup>H NMR spectra of 4-Fluoroaniline.

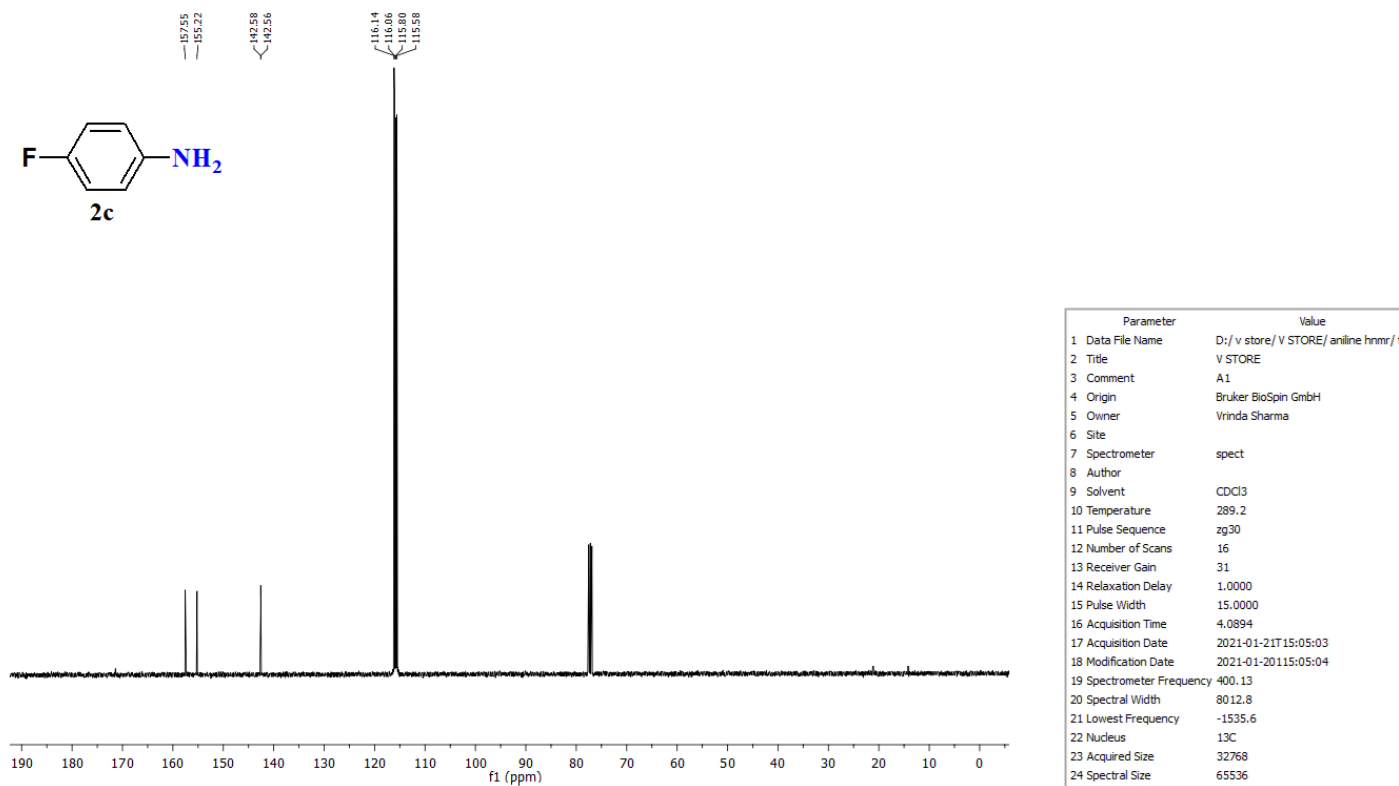

**Figure 6.** <sup>13</sup>C NMR spectra of 4-Fluoroaniline.

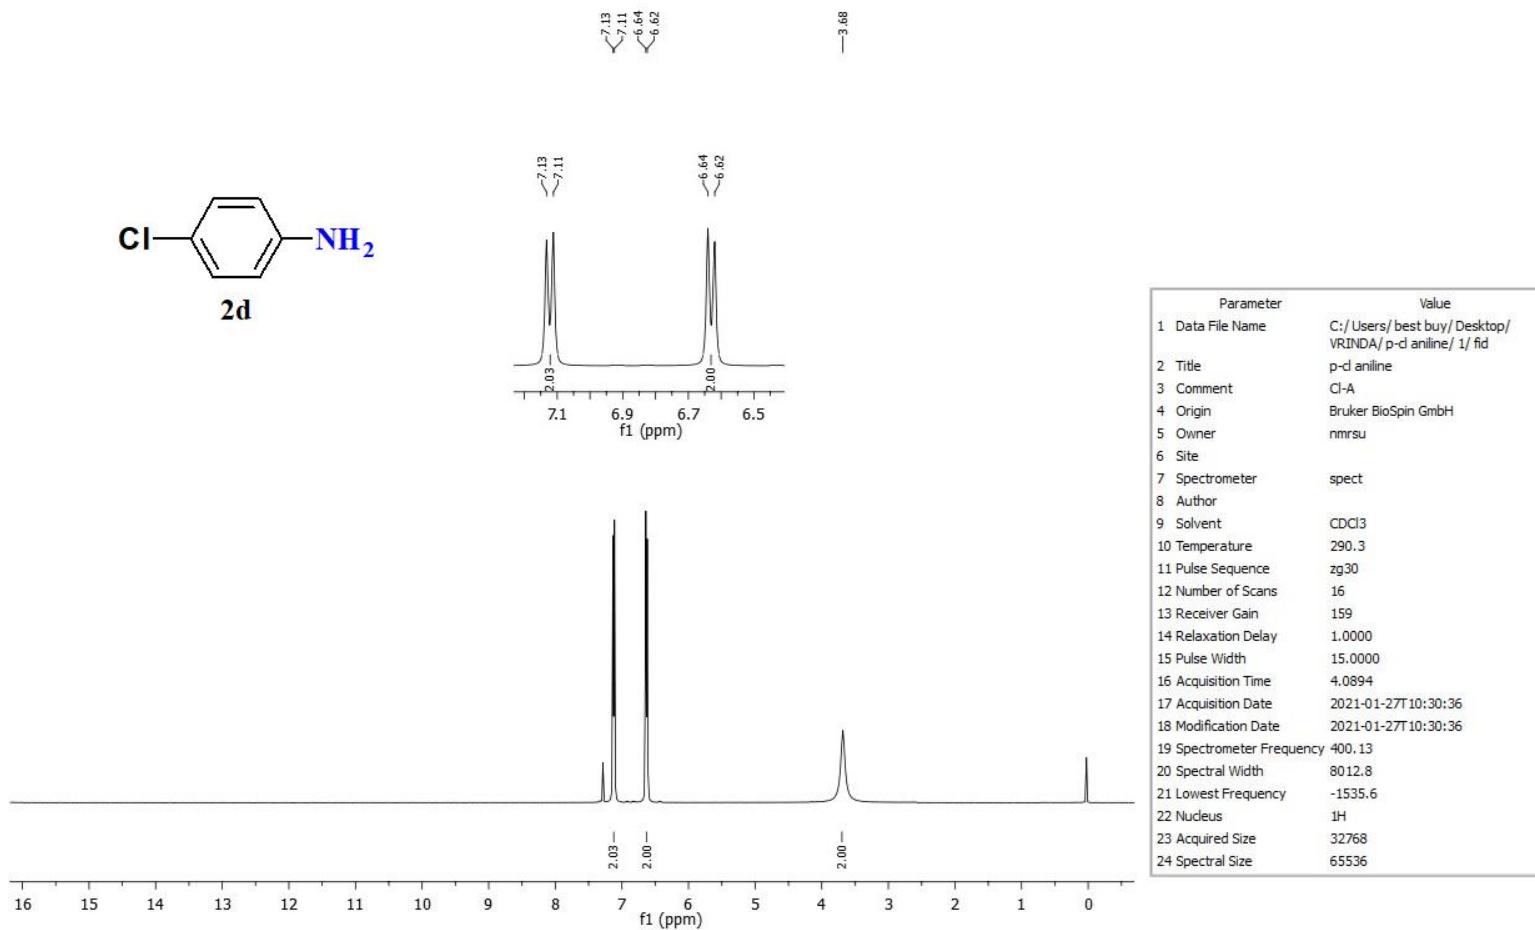

**Figure 7.** <sup>1</sup>H NMR spectra of 4-Chloroaniline.

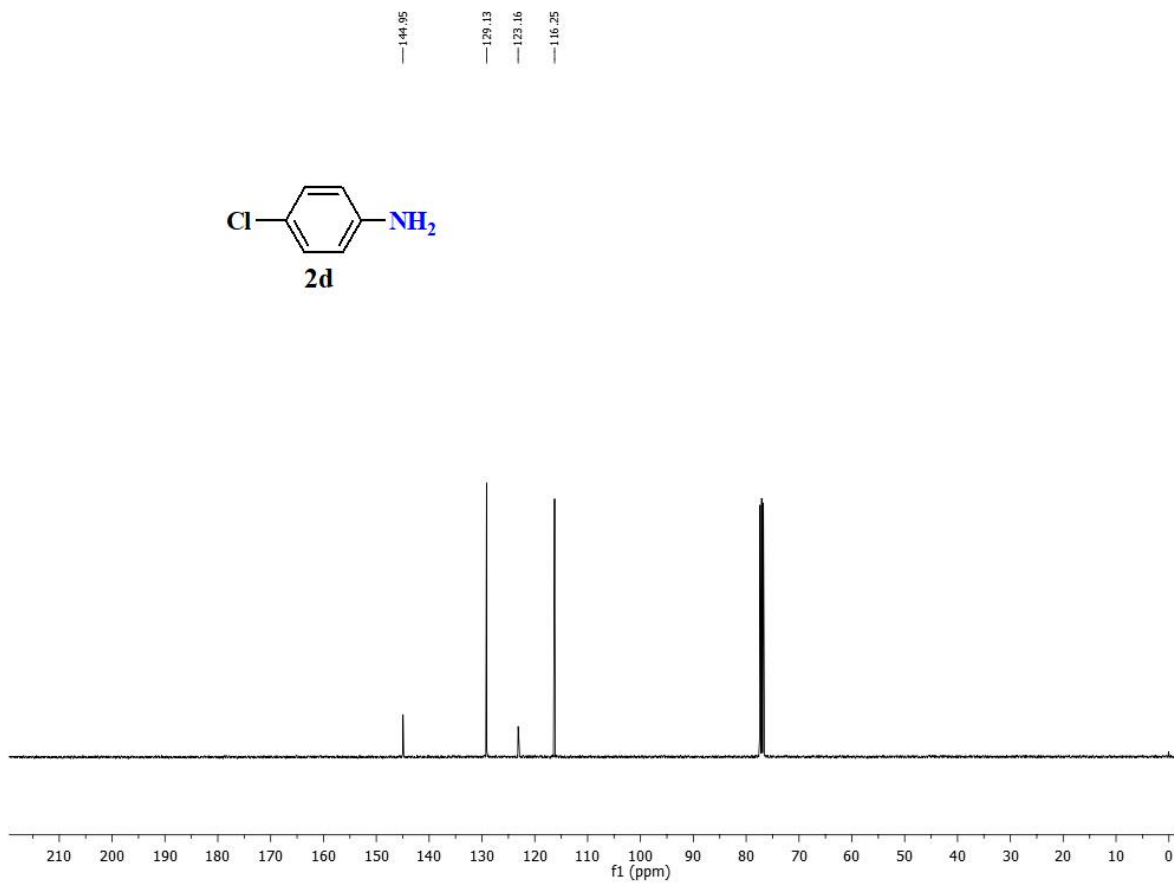

| Parameter                 | Value                                                |
|---------------------------|------------------------------------------------------|
| 1 Data File Name          | C:/Users/best buy/Desktop/VRINDA/p-d aniline/ 2/ fid |
| 2 Title                   | p-d aniline                                          |
| 3 Comment                 | Cl-A                                                 |
| 4 Origin                  | Bruker BioSpin GmbH                                  |
| 5 Owner                   | nmrsu                                                |
| 6 Site                    |                                                      |
| 7 Spectrometer            | spect                                                |
| 8 Author                  |                                                      |
| 9 Solvent                 | CDCl3                                                |
| 10 Temperature            | 290.8                                                |
| 11 Pulse Sequence         | zgpg30                                               |
| 12 Number of Scans        | 1024                                                 |
| 13 Receiver Gain          | 199                                                  |
| 14 Relaxation Delay       | 2.0000                                               |
| 15 Pulse Width            | 9.8000                                               |
| 16 Acquisition Time       | 1.3631                                               |
| 17 Acquisition Date       | 2021-01-27T11:29:48                                  |
| 18 Modification Date      | 2021-01-27T11:29:48                                  |
| 19 Spectrometer Frequency | 100.61                                               |
| 20 Spectral Width         | 24038.5                                              |
| 21 Lowest Frequency       | -1958.4                                              |
| 22 Nucleus                | $^{13}\text{C}$                                      |
| 23 Acquired Size          | 32768                                                |
| 24 Spectral Size          | 65536                                                |

**Figure 8.**  $^{13}\text{C}$  NMR spectra of 4-Chloroaniline.

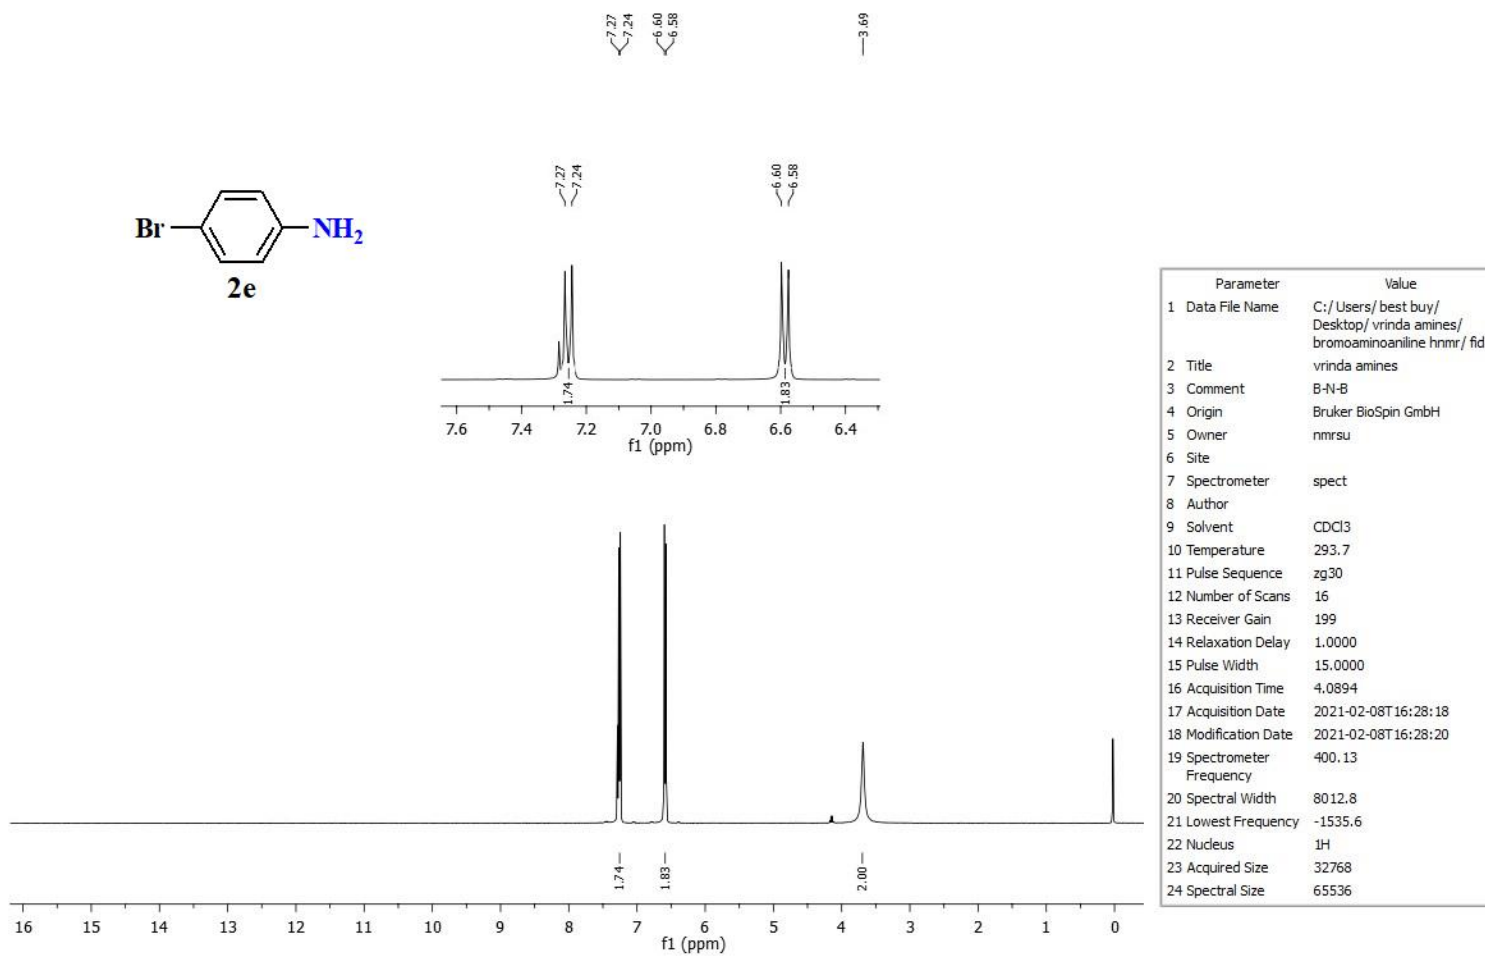

**Figure 9.** <sup>1</sup>H NMR spectra of 4-Bromoaniline.

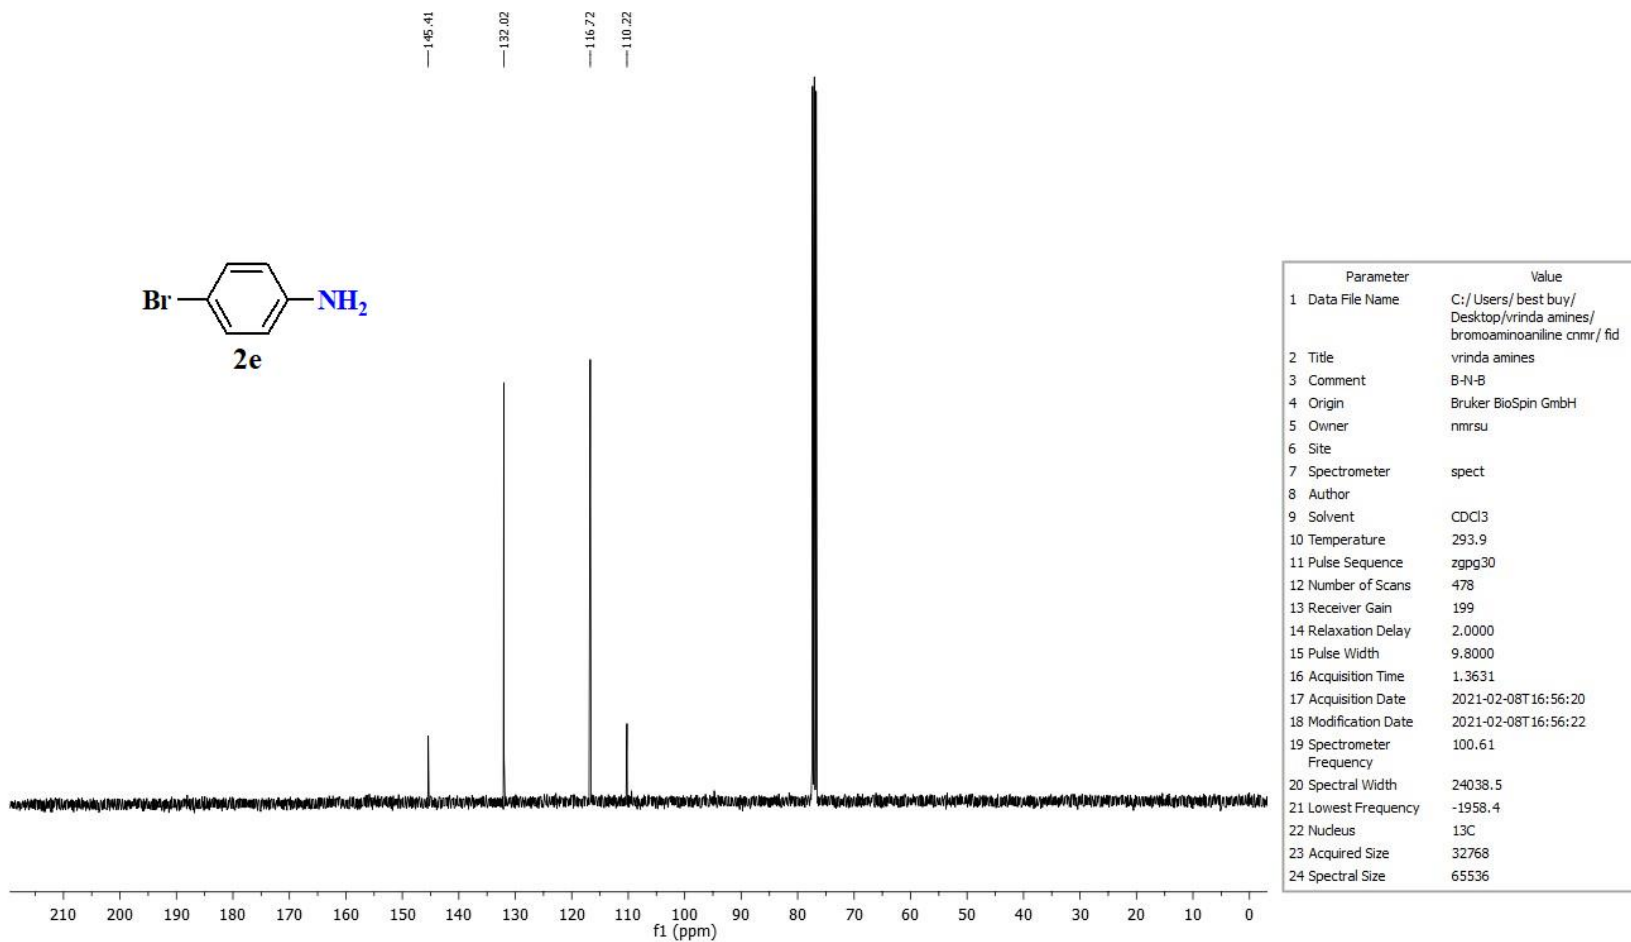

**Figure 10.**  $^{13}\text{C}$  NMR spectra of 4-Bromoaniline.

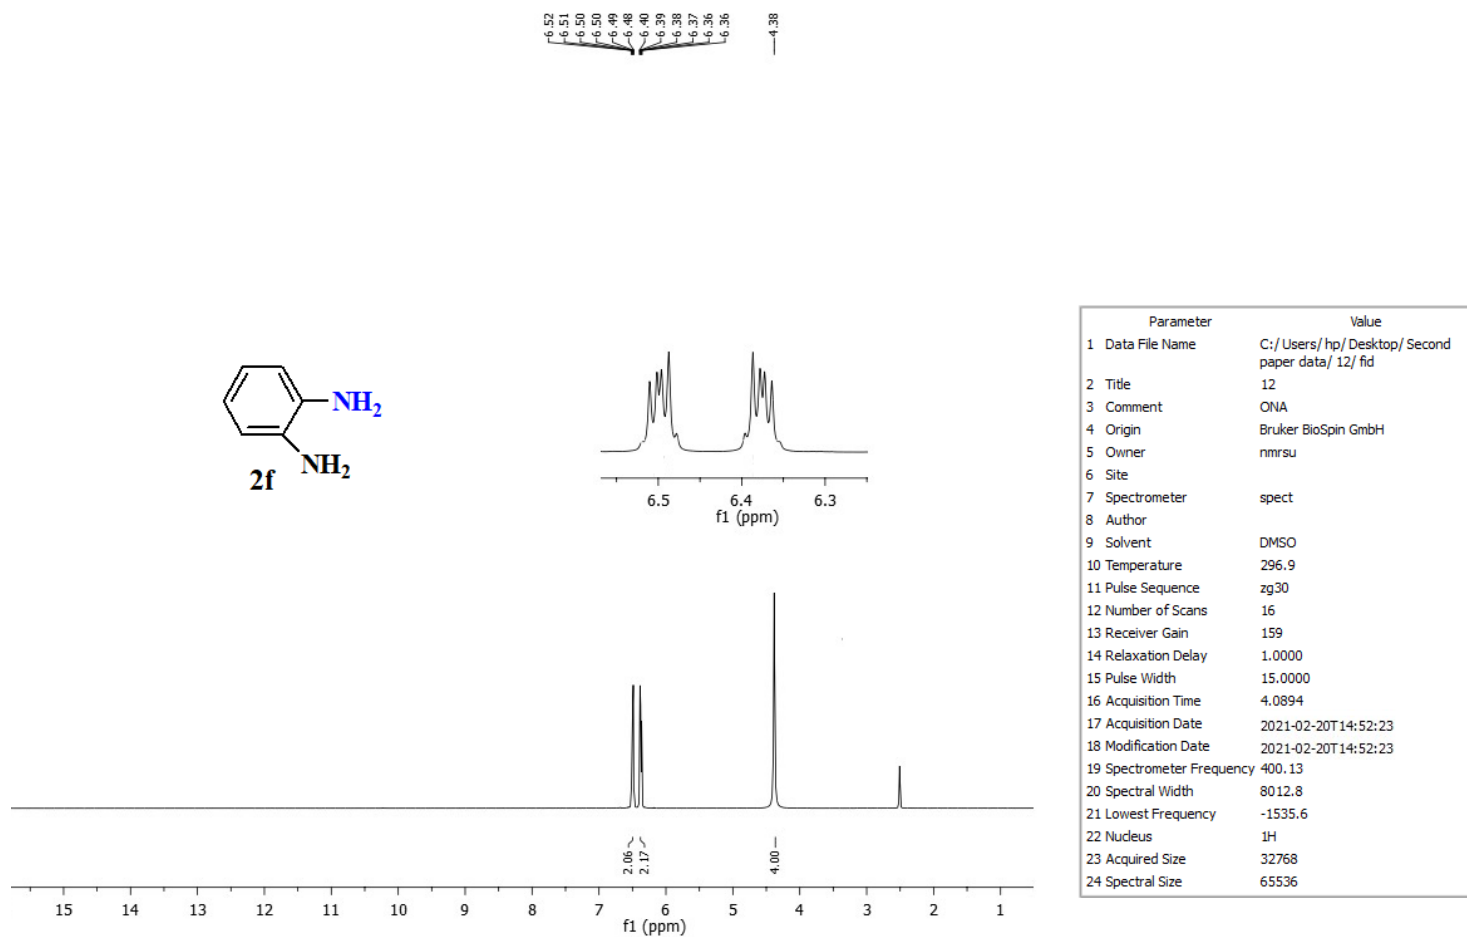

**Figure 11.** <sup>1</sup>H NMR spectra of 1,2-Diaminobenzene.



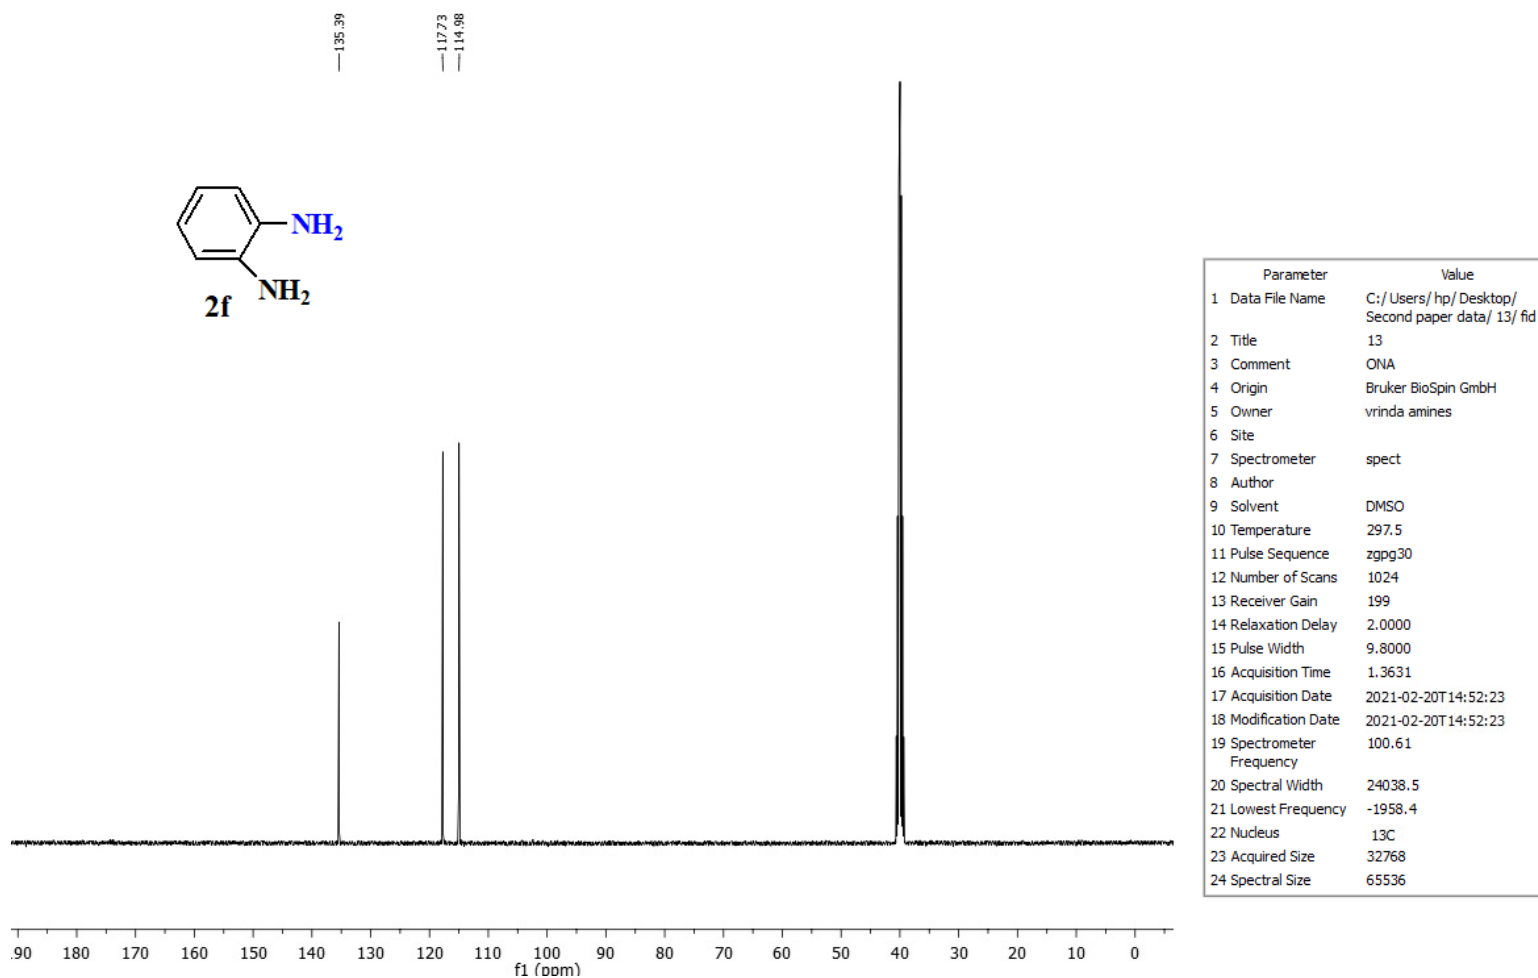

**Figure 12.**  $^{13}\text{C}$  NMR spectra of 1,2-Diaminobenzene.

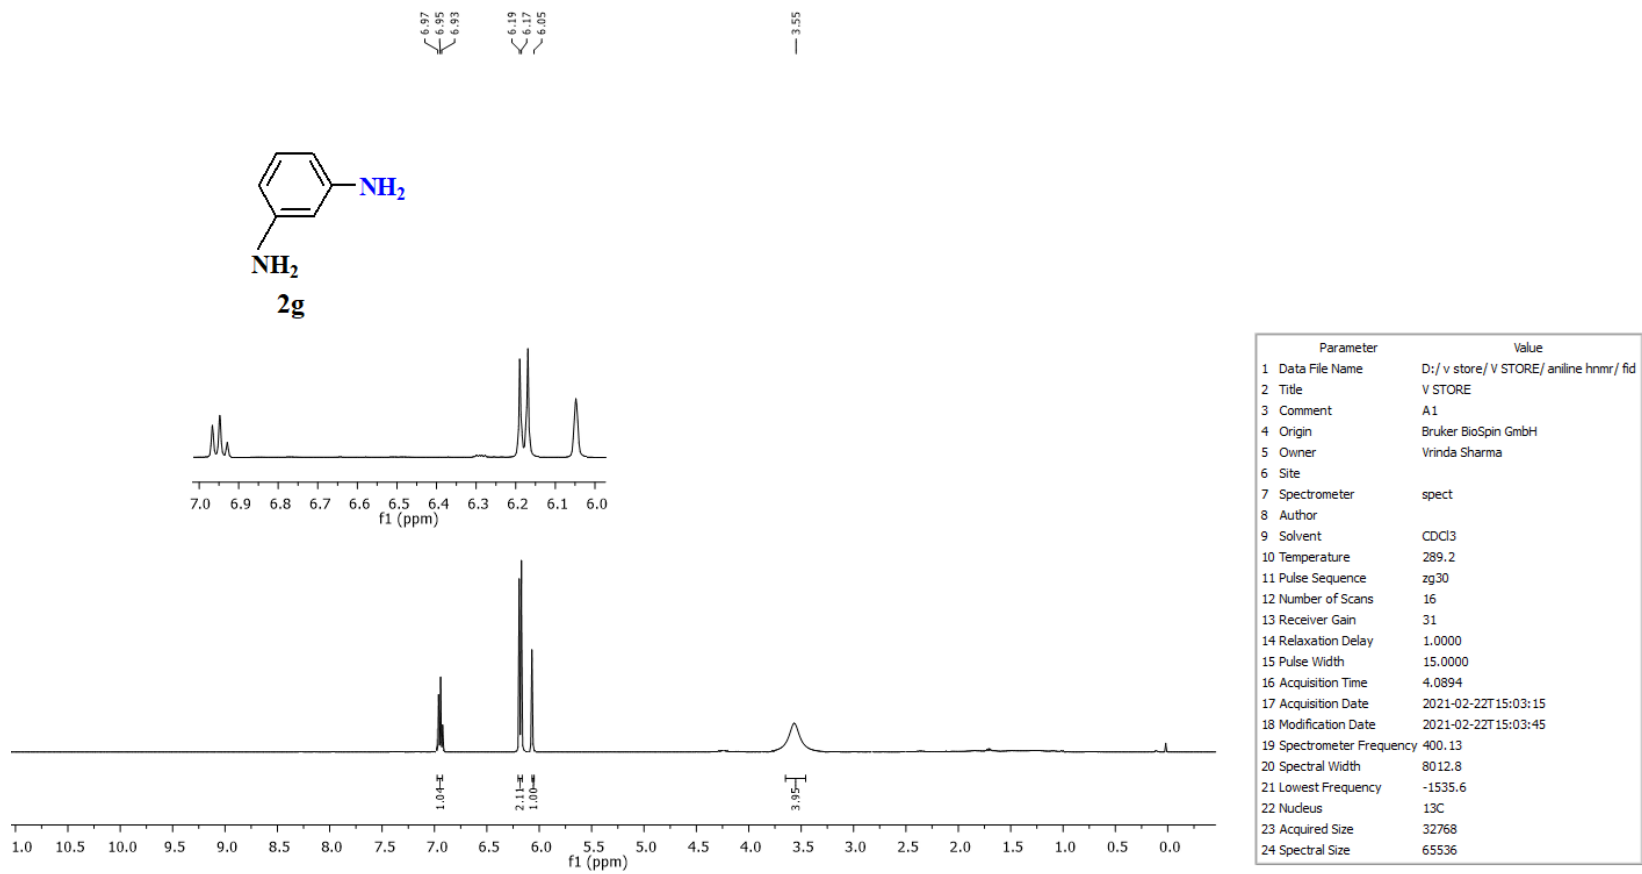

**Figure 13.** <sup>1</sup>H NMR spectra of 1,3-Diaminobenzene.

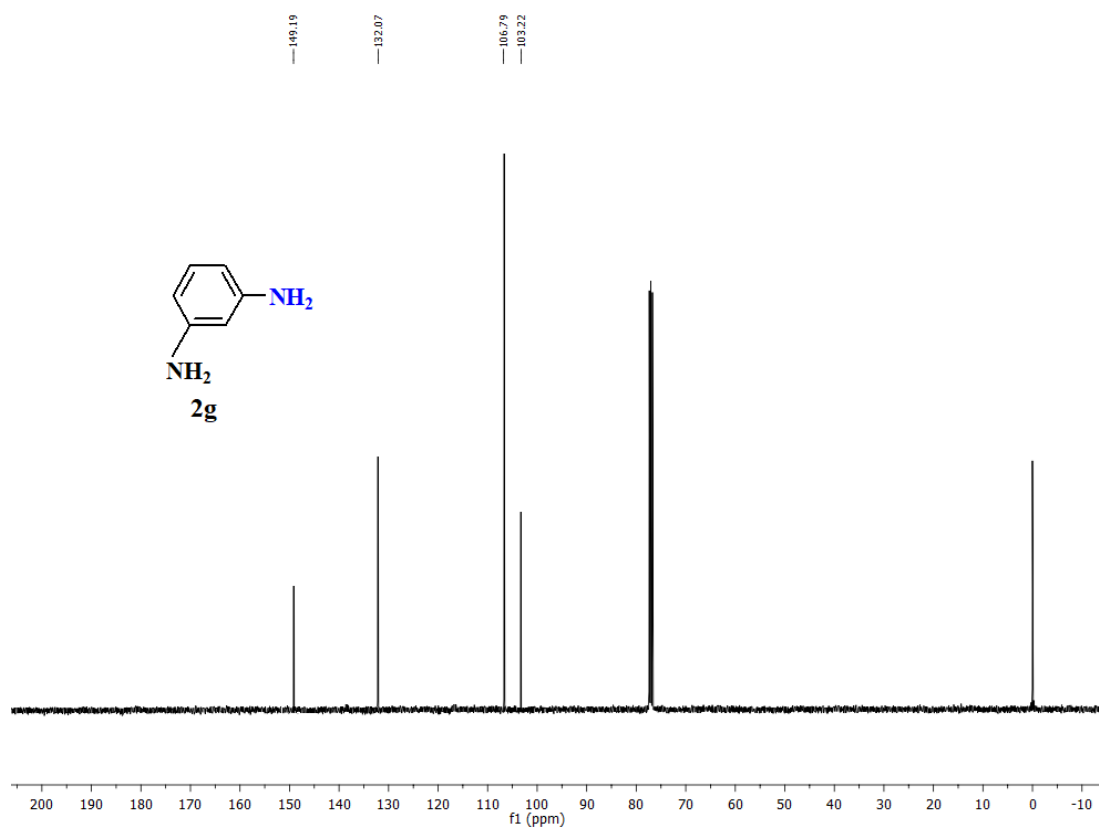

| Parameter                 | Value                                 |
|---------------------------|---------------------------------------|
| 1 Data File Name          | D:/v store/V STORE/ aniline hnmr/ fid |
| 2 Title                   | V STORE                               |
| 3 Comment                 | A1                                    |
| 4 Origin                  | Bruker BioSpin GmbH                   |
| 5 Owner                   | Vrinda Sharma                         |
| 6 Site                    |                                       |
| 7 Spectrometer            | spect                                 |
| 8 Author                  |                                       |
| 9 Solvent                 | CDCl3                                 |
| 10 Temperature            | 289.2                                 |
| 11 Pulse Sequence         | zg30                                  |
| 12 Number of Scans        | 16                                    |
| 13 Receiver Gain          | 31                                    |
| 14 Relaxation Delay       | 1.0000                                |
| 15 Pulse Width            | 15.0000                               |
| 16 Acquisition Time       | 4.0894                                |
| 17 Acquisition Date       | 2021-02-22T15:03:15                   |
| 18 Modification Date      | 2021-02-22T15:03:45                   |
| 19 Spectrometer Frequency | 400.13                                |
| 20 Spectral Width         | 8012.8                                |
| 21 Lowest Frequency       | -1535.6                               |
| 22 Nucleus                | 13C                                   |
| 23 Acquired Size          | 32768                                 |
| 24 Spectral Size          | 65536                                 |

**Figure 14.** <sup>13</sup>C NMR spectra of 1,3-Diaminobenzene.

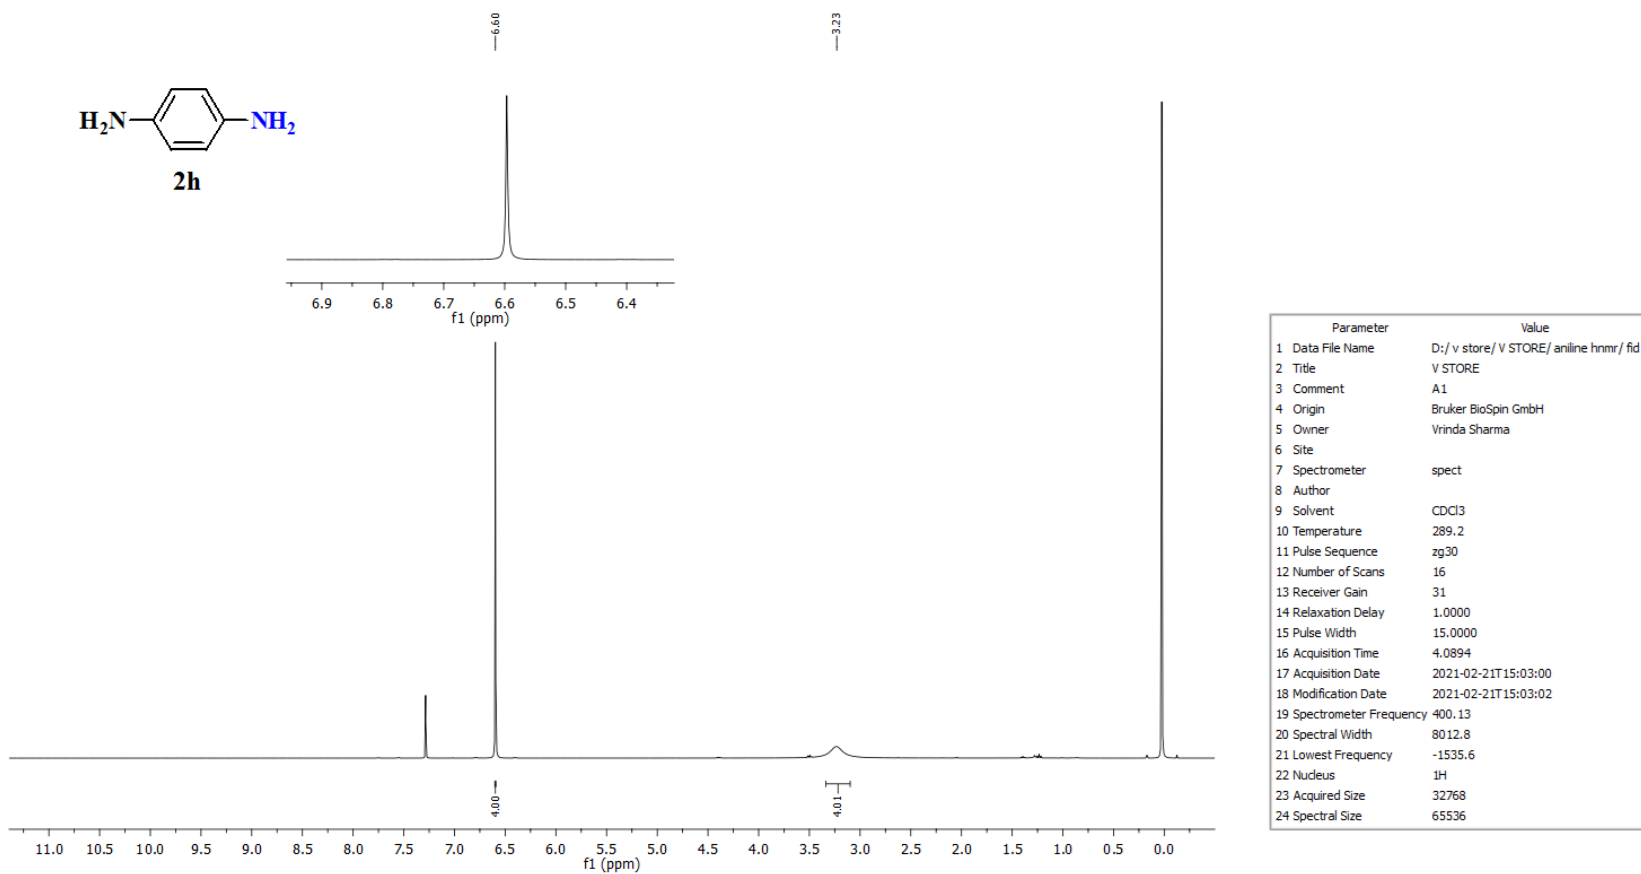

**Figure 15.**  $^1\text{H}$  NMR spectra of 1,4-Diaminobenzene.

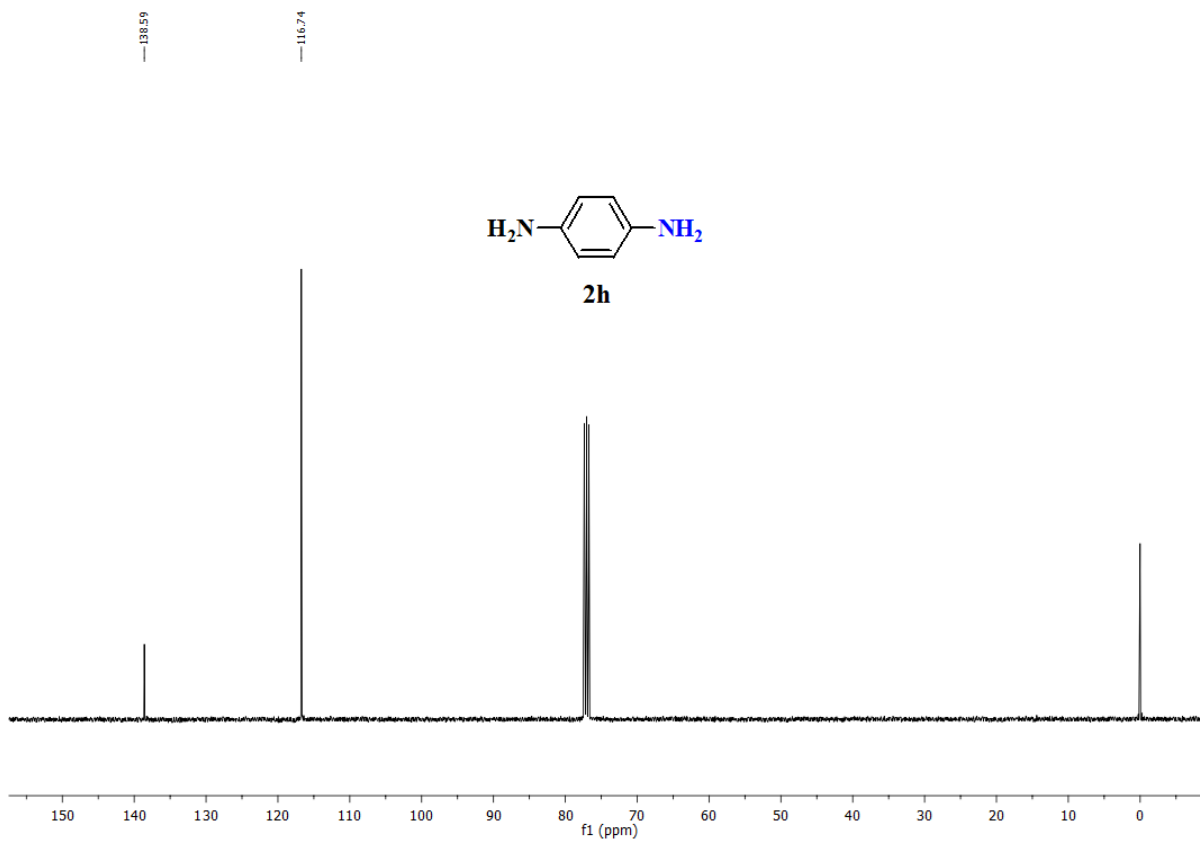

| Parameter                 | Value                                   |
|---------------------------|-----------------------------------------|
| 1 Data File Name          | D:/ v store/ V STORE/ aniline hnmr/ fid |
| 2 Title                   | V STORE                                 |
| 3 Comment                 | A1                                      |
| 4 Origin                  | Bruker BioSpin GmbH                     |
| 5 Owner                   | Vrinda Sharma                           |
| 6 Site                    |                                         |
| 7 Spectrometer            | spect                                   |
| 8 Author                  |                                         |
| 9 Solvent                 | CDCl3                                   |
| 10 Temperature            | 289.2                                   |
| 11 Pulse Sequence         | zg30                                    |
| 12 Number of Scans        | 16                                      |
| 13 Receiver Gain          | 31                                      |
| 14 Relaxation Delay       | 1.0000                                  |
| 15 Pulse Width            | 15.0000                                 |
| 16 Acquisition Time       | 4.0894                                  |
| 17 Acquisition Date       | 2021-02-21T15:03:15                     |
| 18 Modification Date      | 2021-02-21T15:03:45                     |
| 19 Spectrometer Frequency | 400.13                                  |
| 20 Spectral Width         | 8012.8                                  |
| 21 Lowest Frequency       | -1535.6                                 |
| 22 Nucleus                | 13C                                     |
| 23 Acquired Size          | 32768                                   |
| 24 Spectral Size          | 65536                                   |

**Figure 16.**  $^{13}\text{C}$  NMR spectra of 1,4-Diaminobenzene.

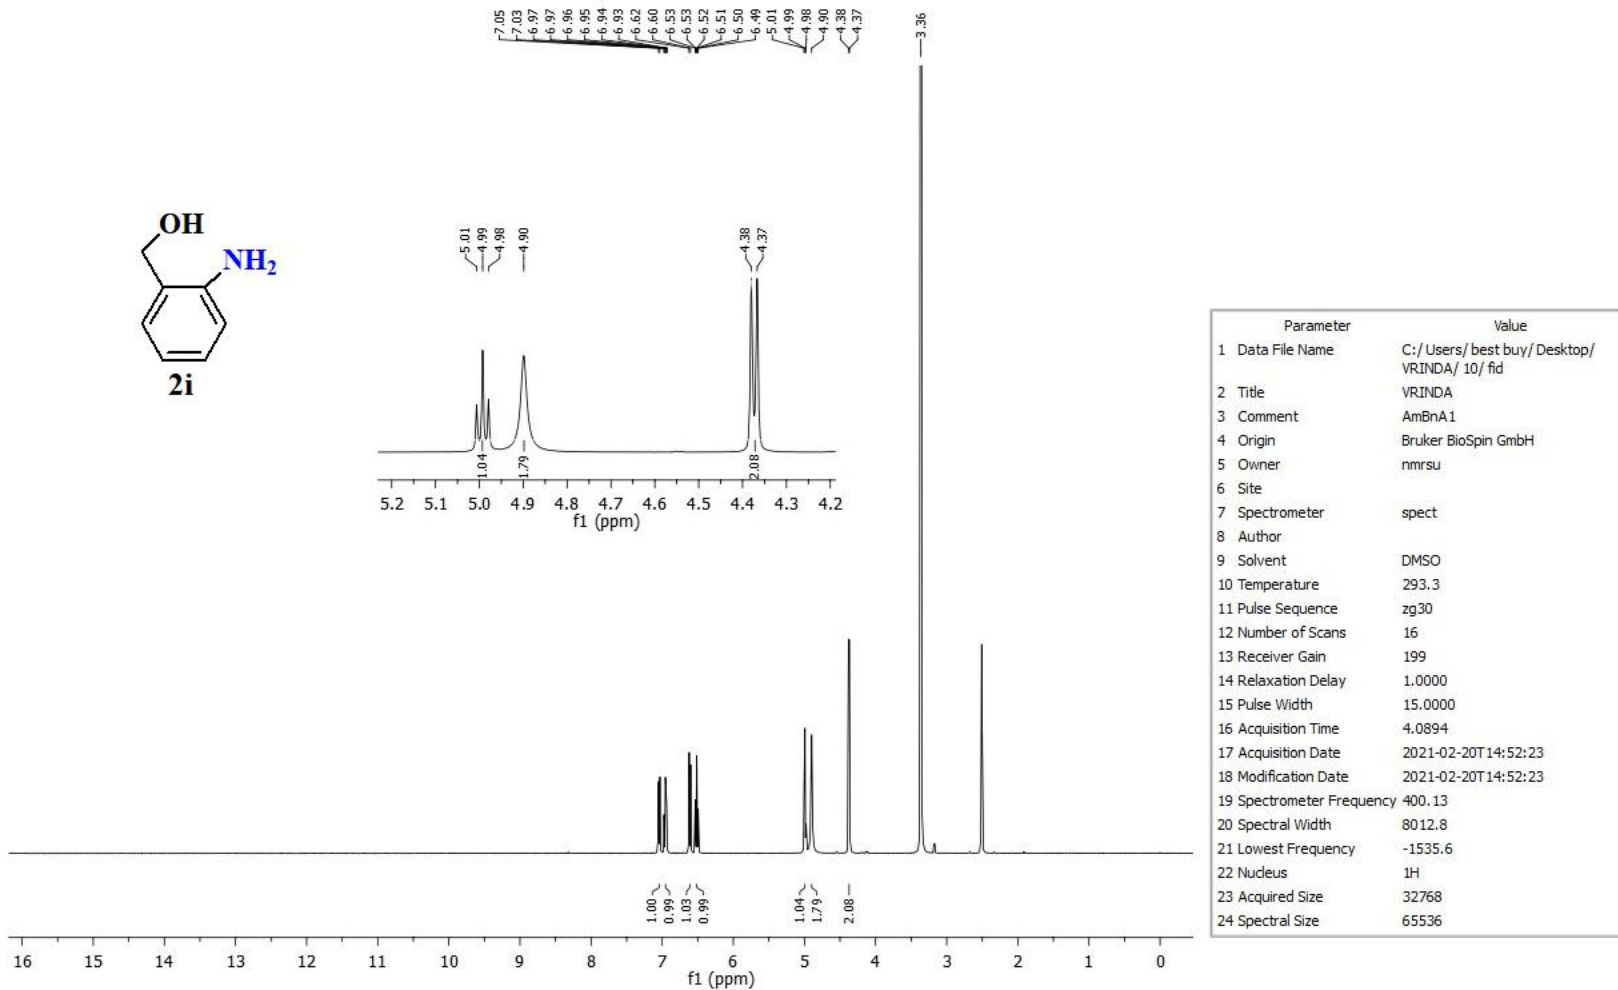

**Figure 17.**  $^1\text{H}$  NMR spectra of 2-Aminobenzylalcohol.

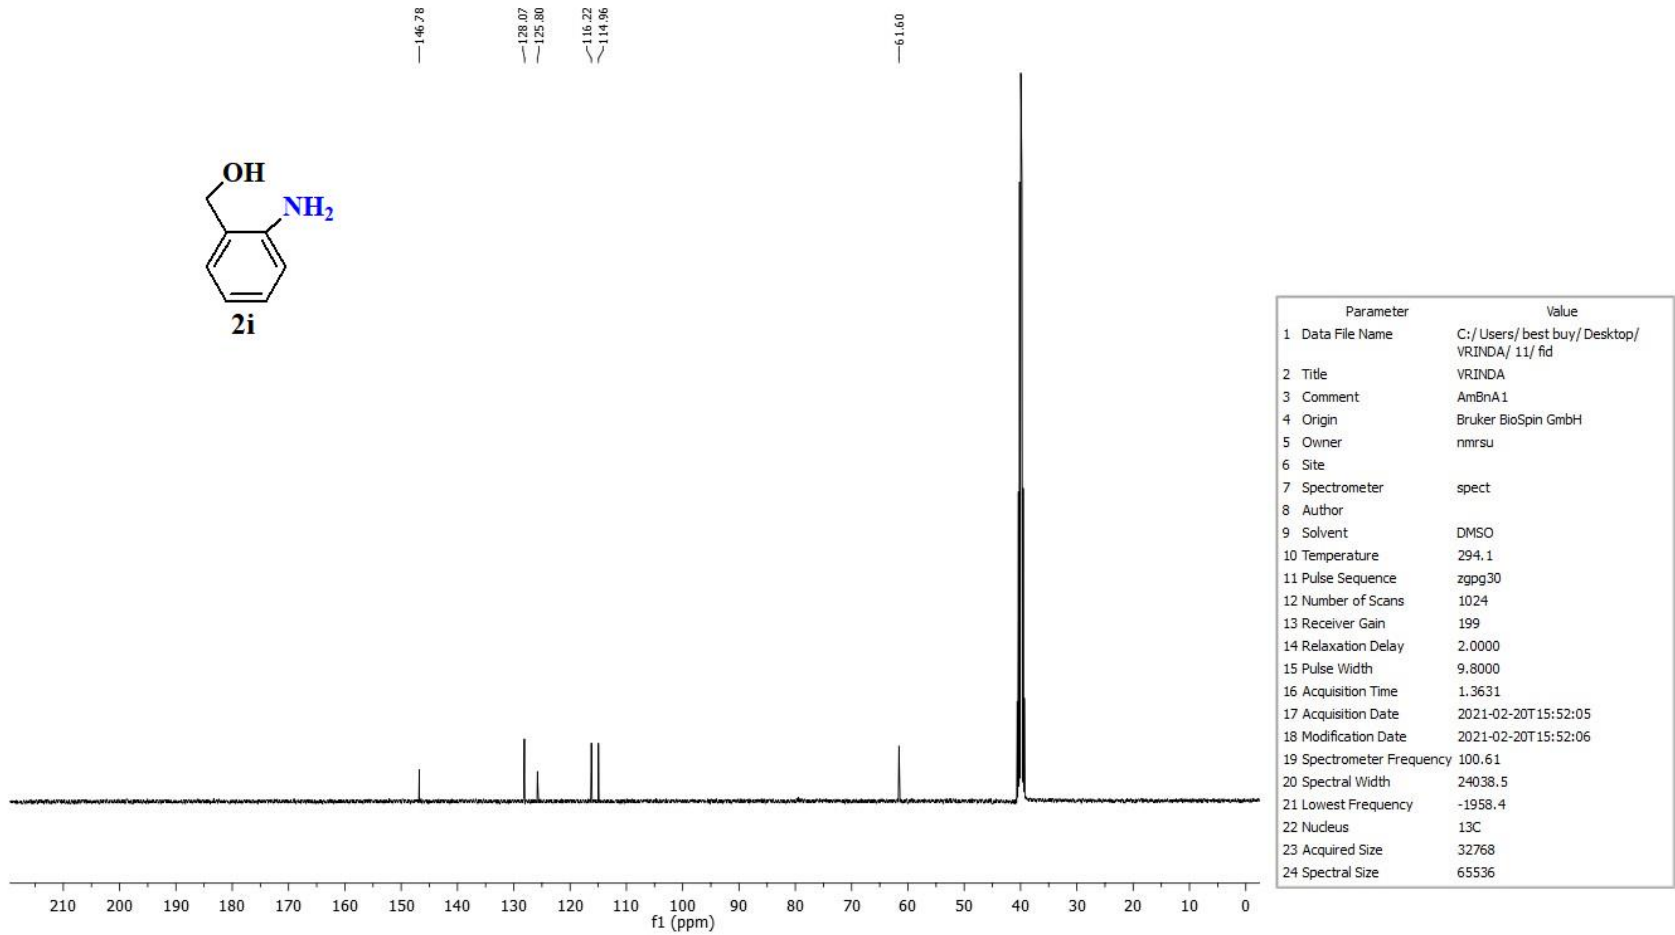

Figure 18. <sup>13</sup>C NMR spectra of 2-Aminobenzylalcohol.

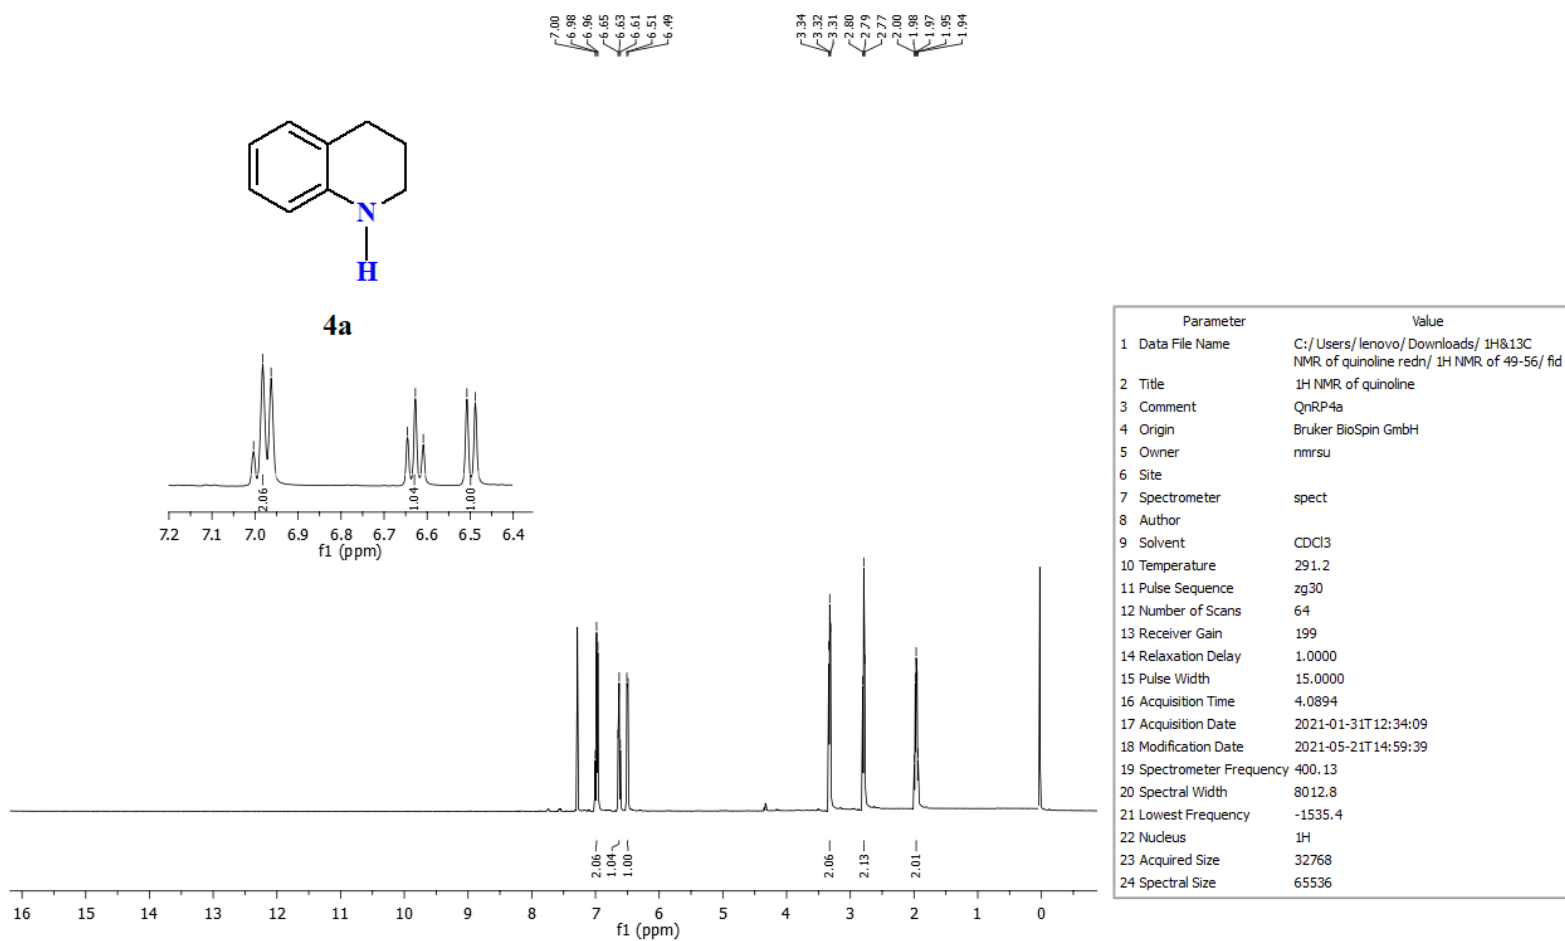

**Figure 19.** <sup>1</sup>H NMR spectra of Quinoline.



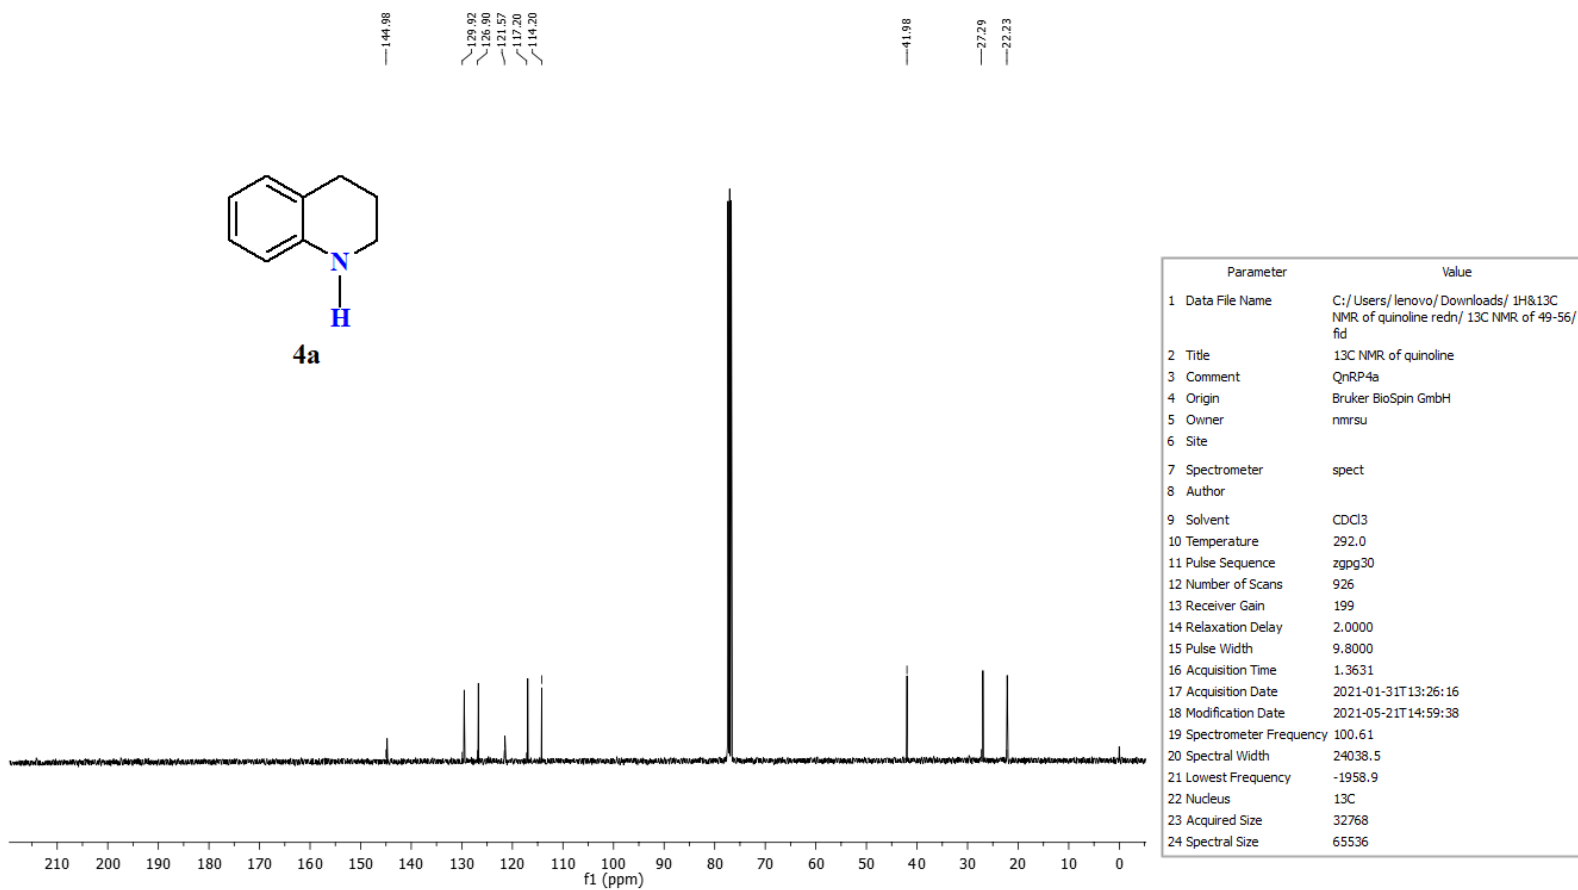

**Figure 20.**  $^{13}\text{C}$  NMR spectra of Quinoline.

S4.  $^1\text{H}$  NMR and  $^{13}\text{C}$  NMR spectra of compounds listed in Table 5

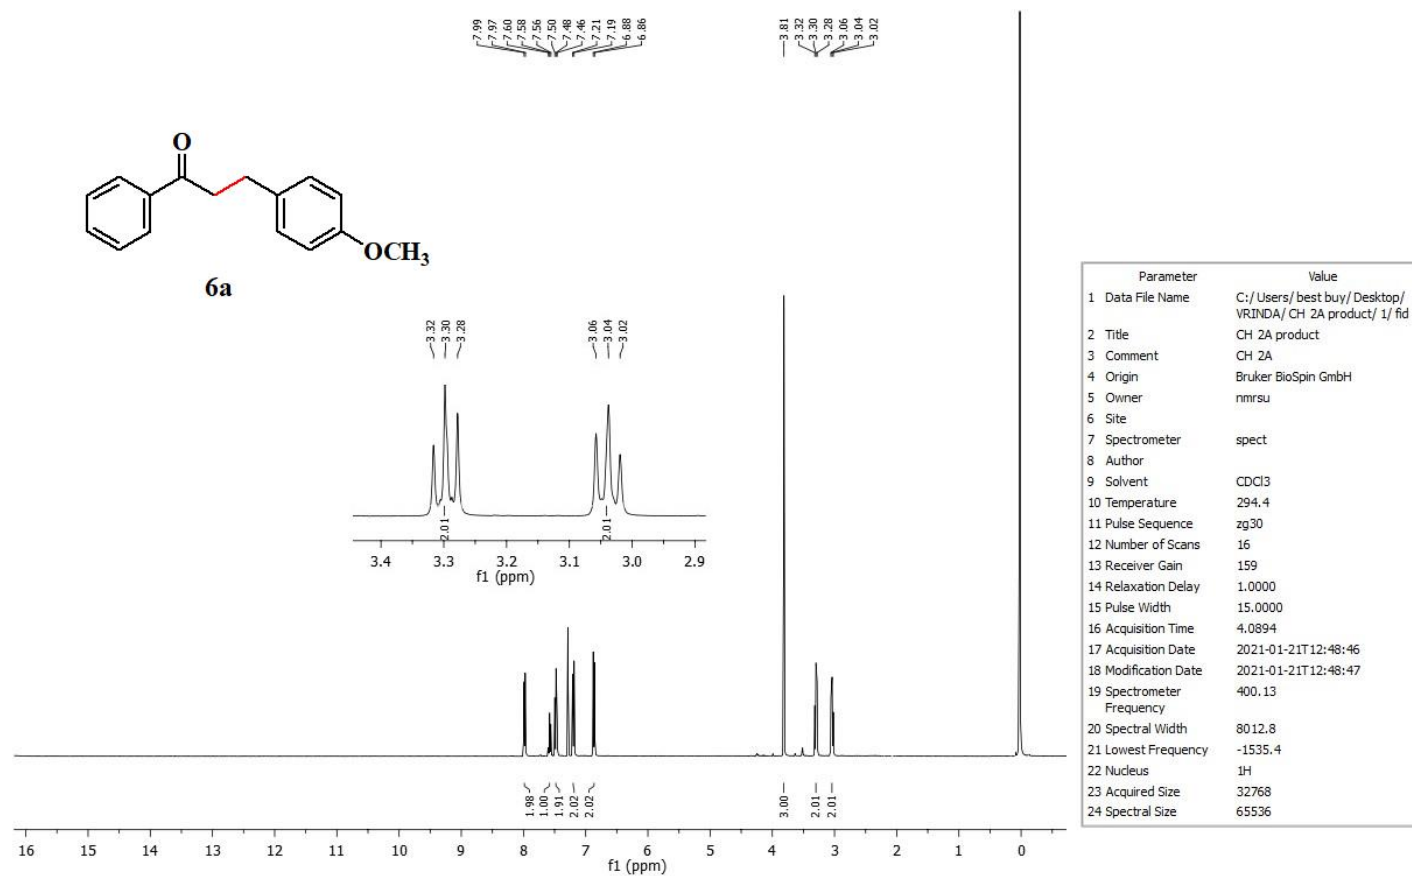

Figure 21.  $^1\text{H}$  NMR spectra of 3-(4-Methoxyphenyl)-1-phenylpropan-1-one.

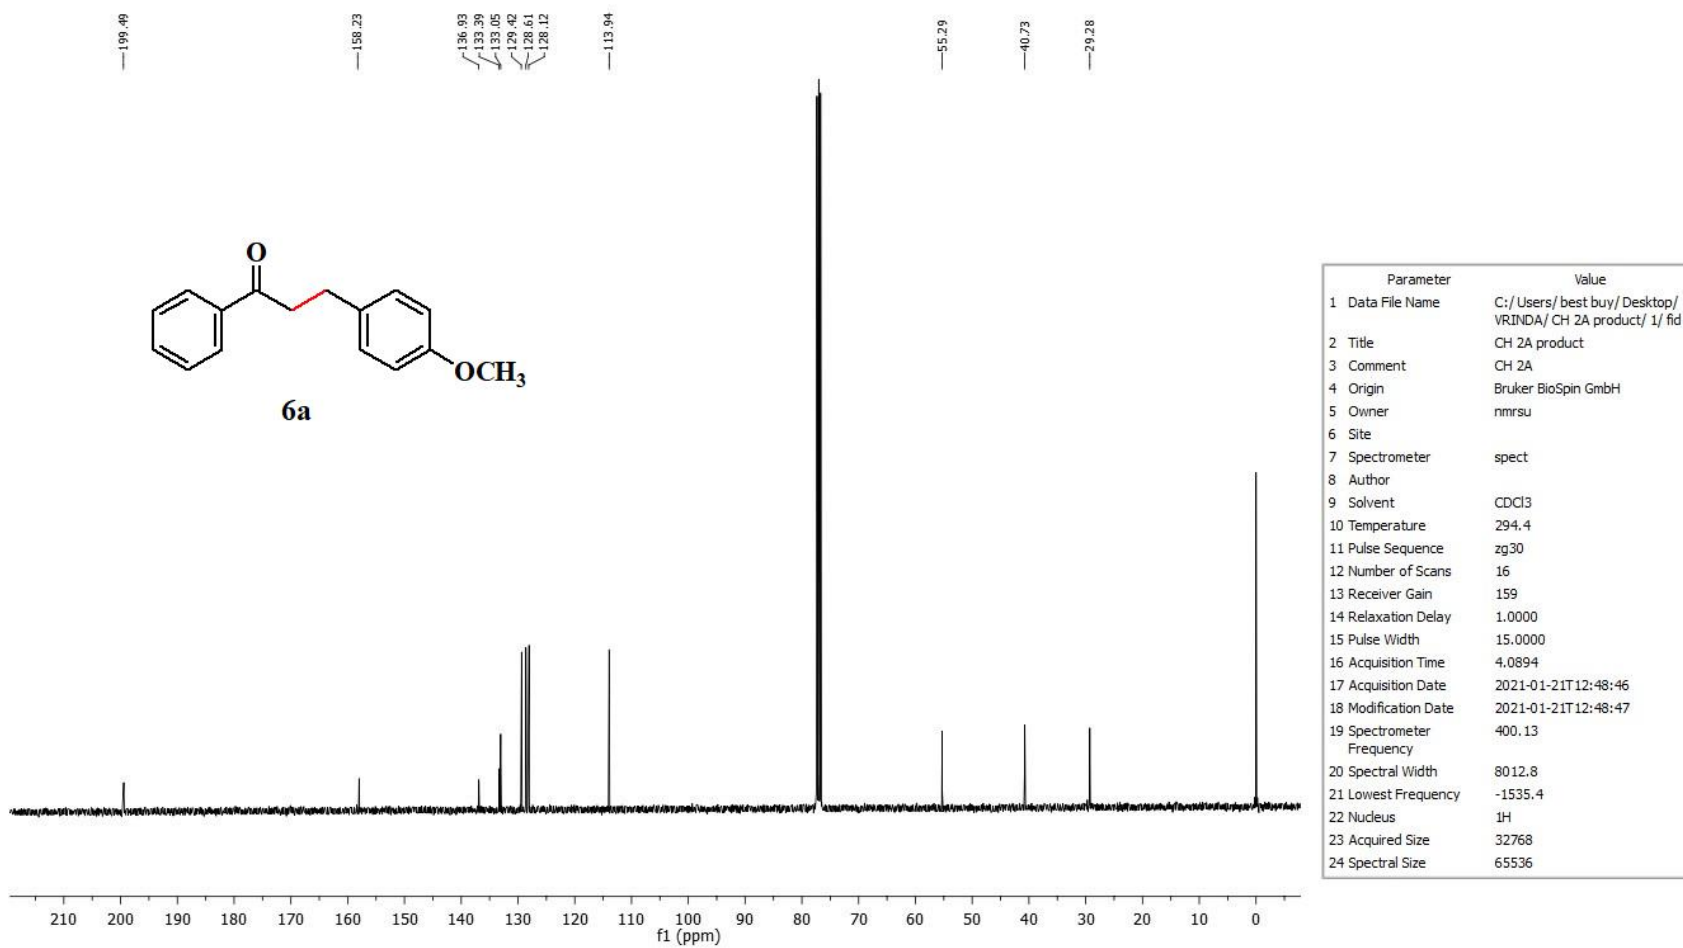

**Figure 22.**  $^{13}\text{C}$  NMR spectra of 3-(4-Methoxyphenyl)-1-phenylpropan-1-one.

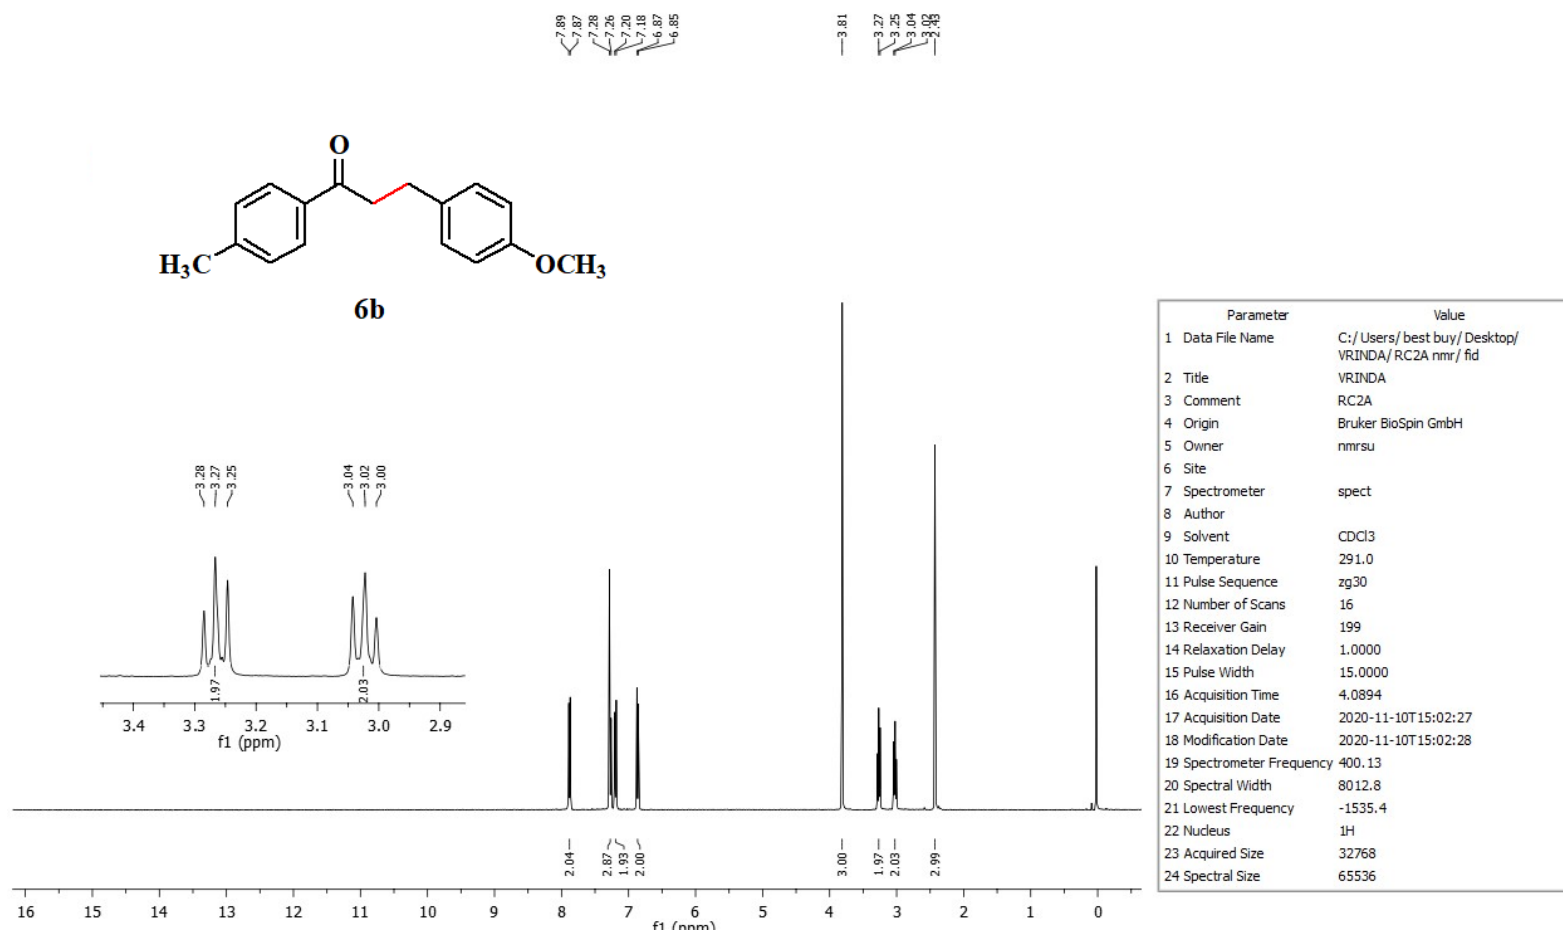

**Figure 23.** <sup>1</sup>H NMR spectra of 3-(4-Methoxyphenyl)-1-(4-methylphenyl)propan-1-one.

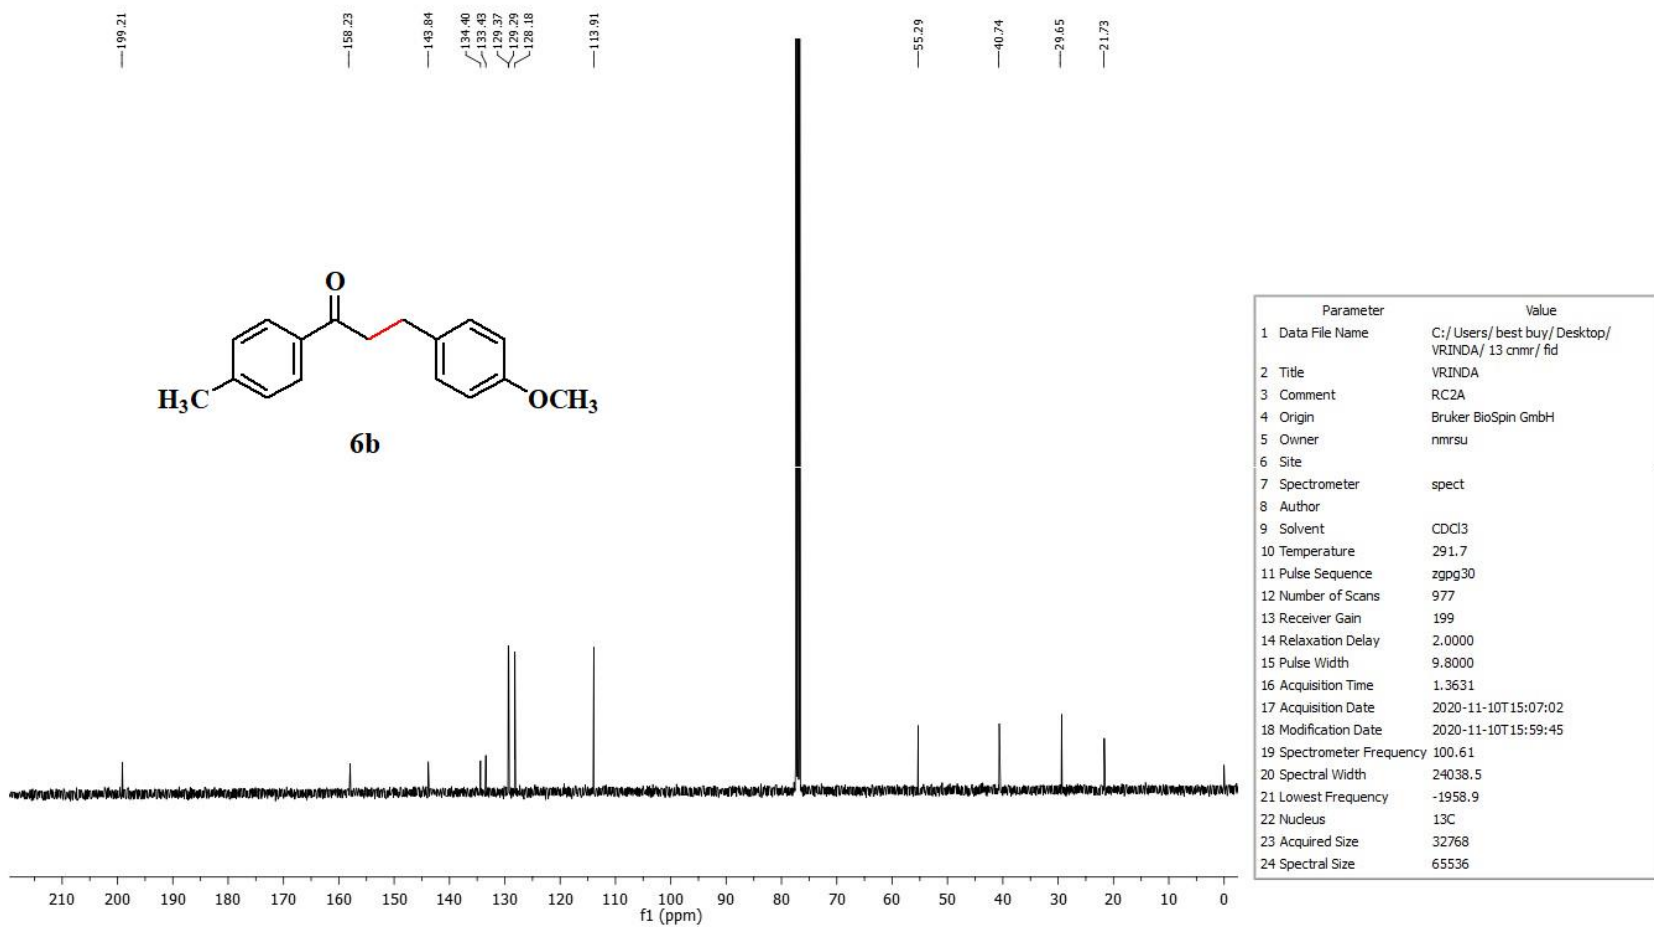

Figure 24. <sup>13</sup>C NMR spectra of 3-(4-Methoxyphenyl)-1-(4-methylphenyl)propan-1-one.

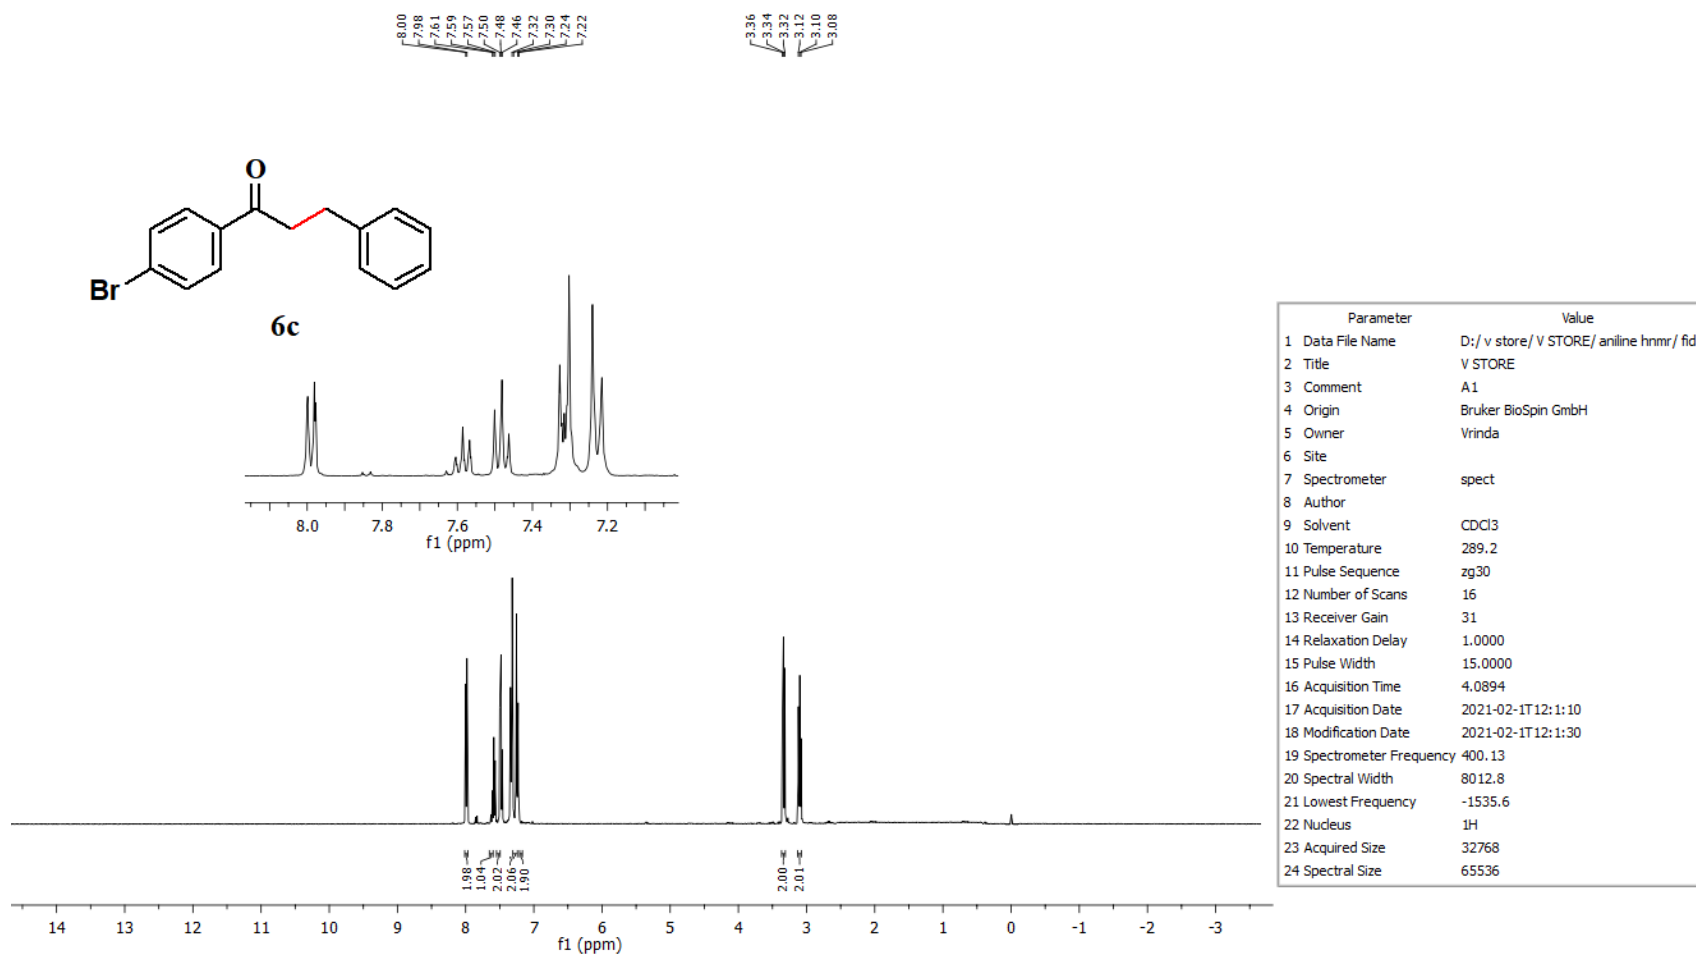

**Figure 25.** <sup>1</sup>H NMR spectra of 1-(4-Bromophenyl)-3-phenylpropan-1-one.

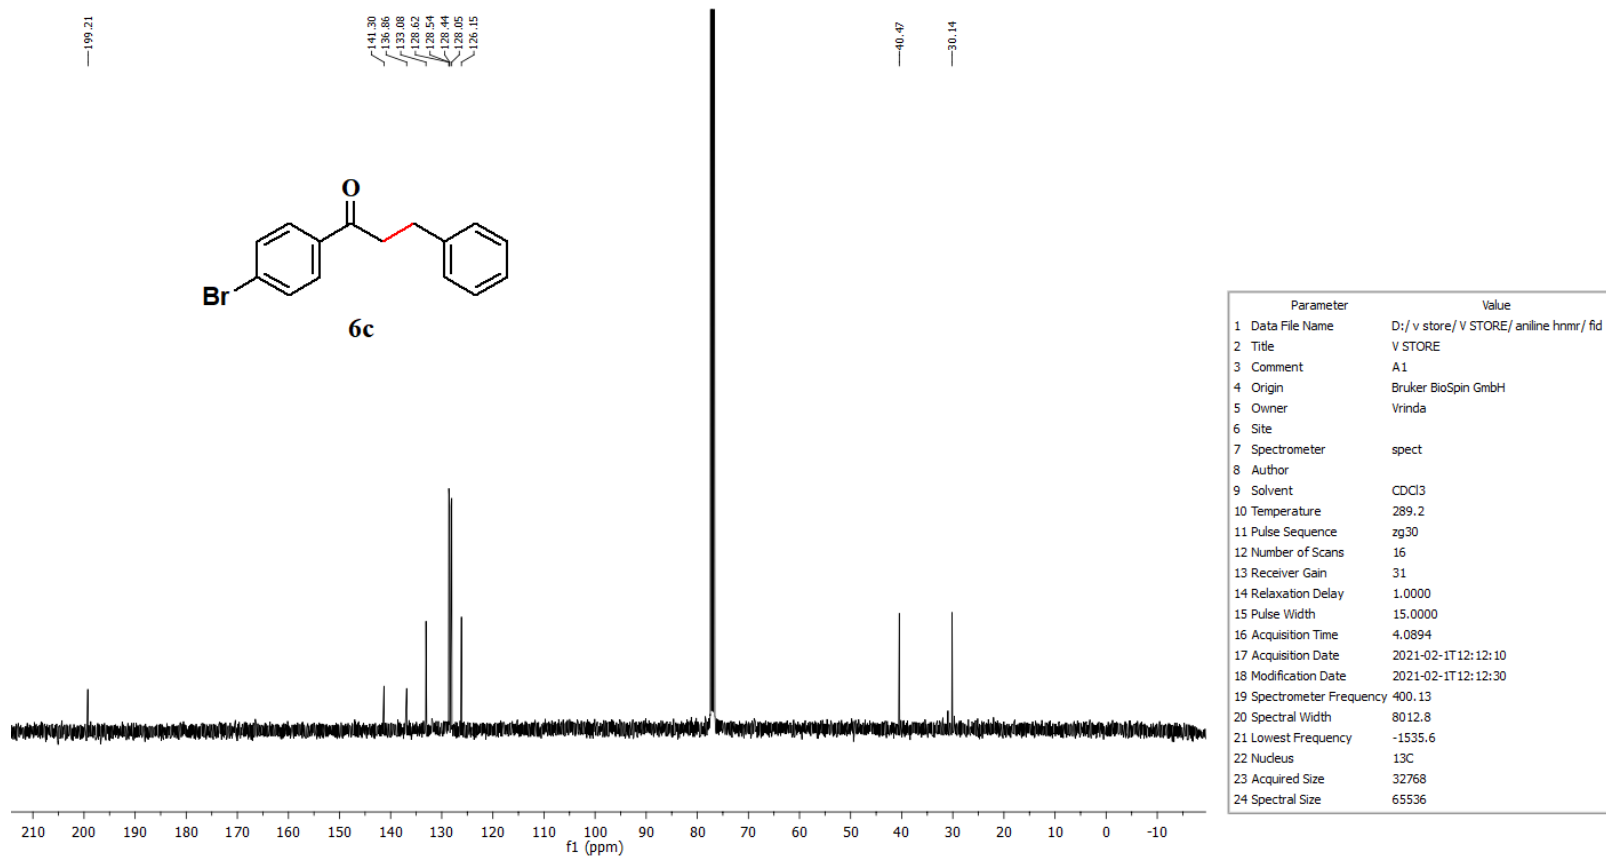

**Figure 26.**  $^{13}\text{C}$  NMR spectra of 1-(4-Bromophenyl)-3-phenylpropan-1-one.

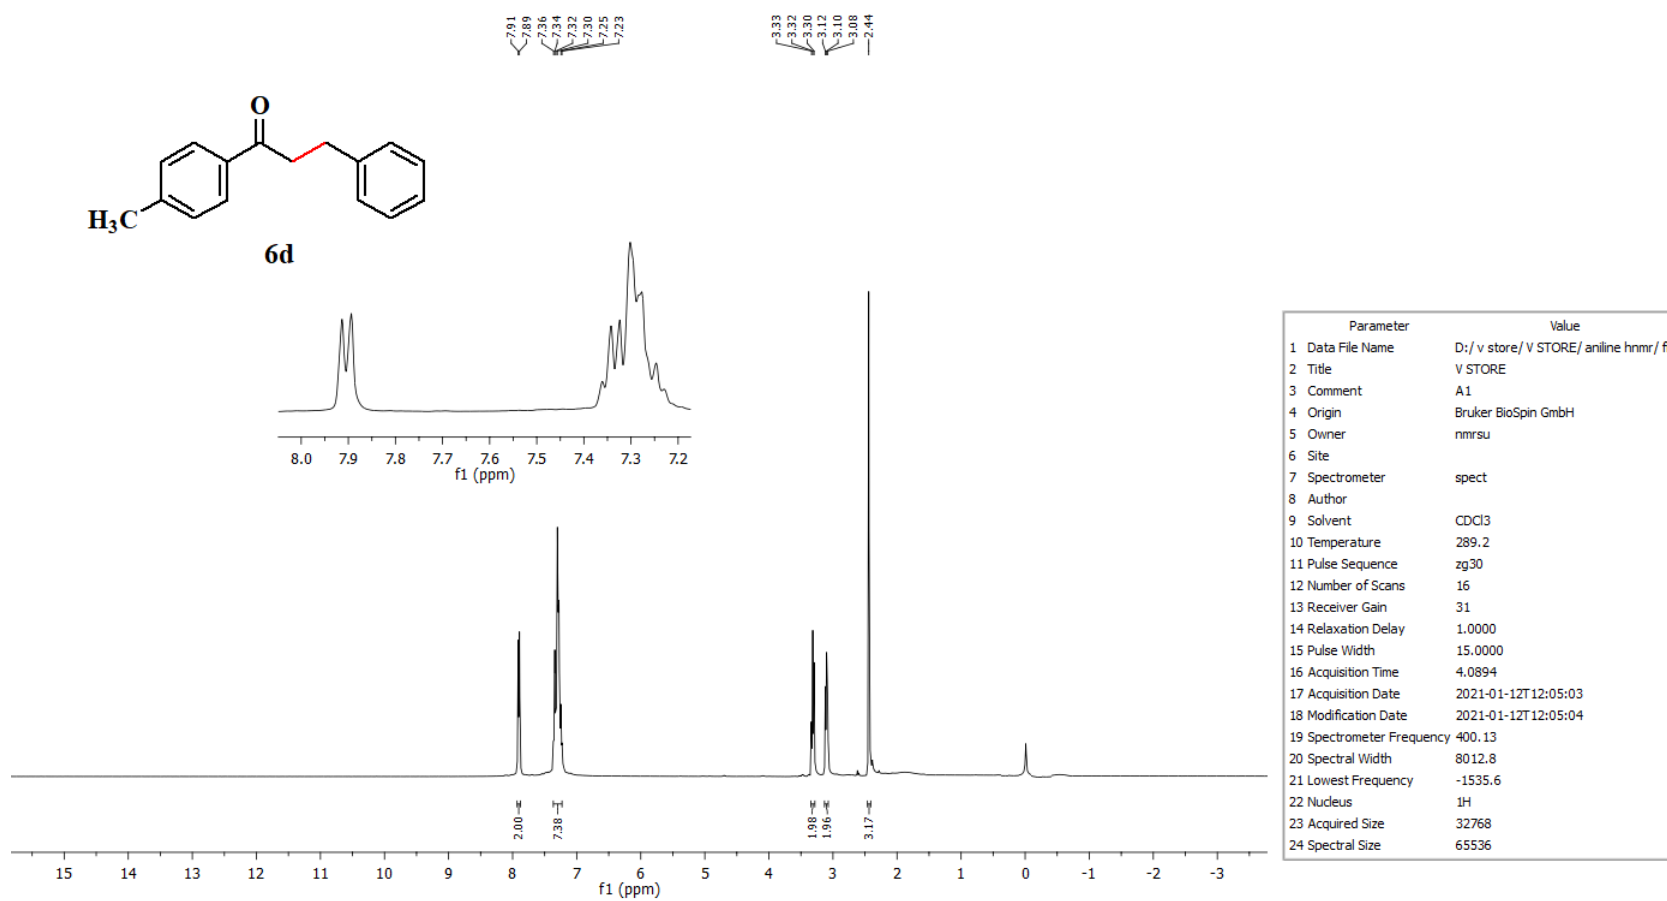

**Figure 27.** <sup>1</sup>H NMR spectra of 1-(4-Methylphenyl)-3-phenylpropan-1-one.



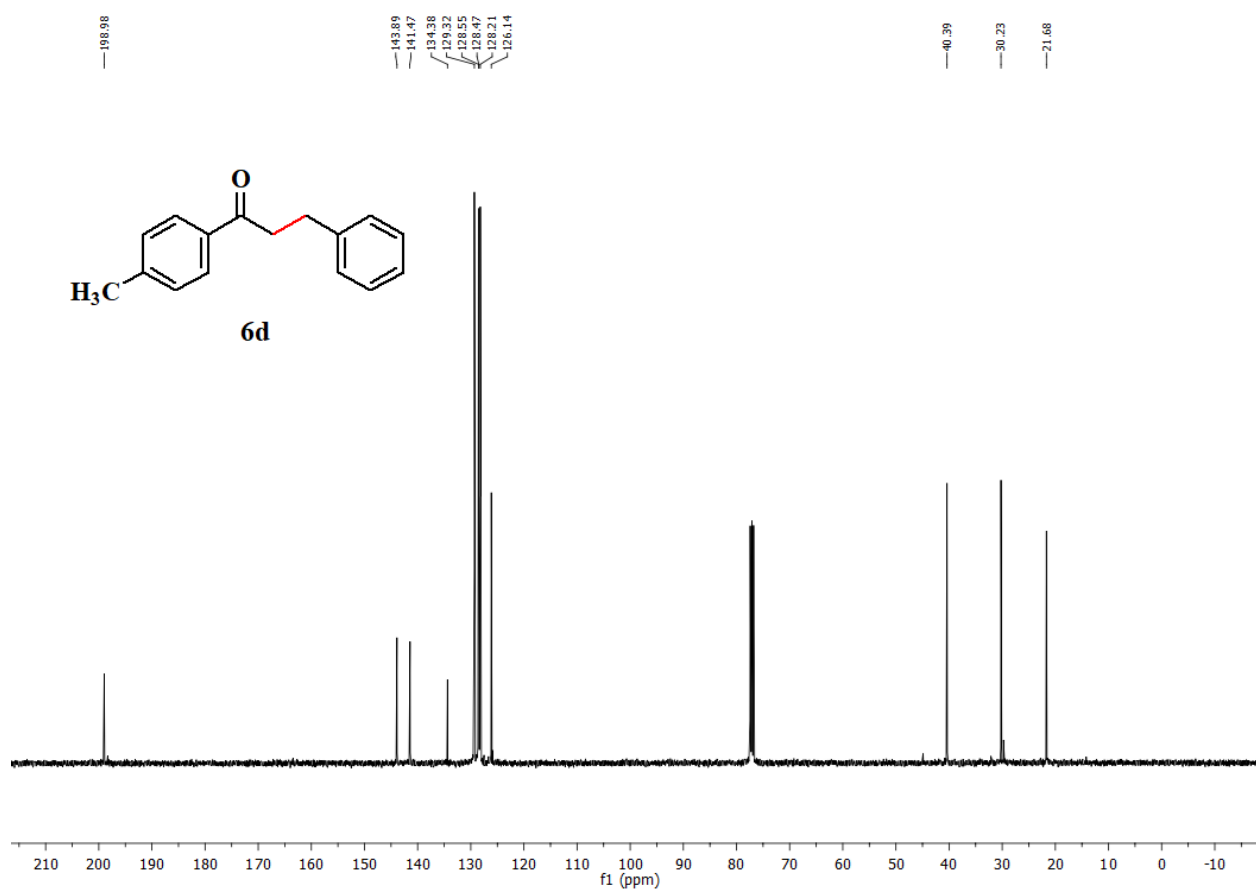

| Parameter                 | Value                                  |
|---------------------------|----------------------------------------|
| 1 Data File Name          | D:/v store/ V STORE/ aniline hnmr/ fid |
| 2 Title                   | V STORE                                |
| 3 Comment                 | A1                                     |
| 4 Origin                  | Bruker BioSpin GmbH                    |
| 5 Owner                   | nmsu                                   |
| 6 Site                    |                                        |
| 7 Spectrometer            | spect                                  |
| 8 Author                  |                                        |
| 9 Solvent                 | CDCl3                                  |
| 10 Temperature            | 289.2                                  |
| 11 Pulse Sequence         | zg30                                   |
| 12 Number of Scans        | 16                                     |
| 13 Receiver Gain          | 31                                     |
| 14 Relaxation Delay       | 1.0000                                 |
| 15 Pulse Width            | 15.0000                                |
| 16 Acquisition Time       | 4.0894                                 |
| 17 Acquisition Date       | 2021-01-13T12:05:10                    |
| 18 Modification Date      | 2021-01-13T12:05:30                    |
| 19 Spectrometer Frequency | 400.13                                 |
| 20 Spectral Width         | 8012.8                                 |
| 21 Lowest Frequency       | -1535.6                                |
| 22 Nucleus                | 13C                                    |
| 23 Acquired Size          | 32768                                  |
| 24 Spectral Size          | 65536                                  |

**Figure 28.** <sup>13</sup>C NMR spectra of 1-(4-Methylphenyl)-3-phenylpropan-1-one.

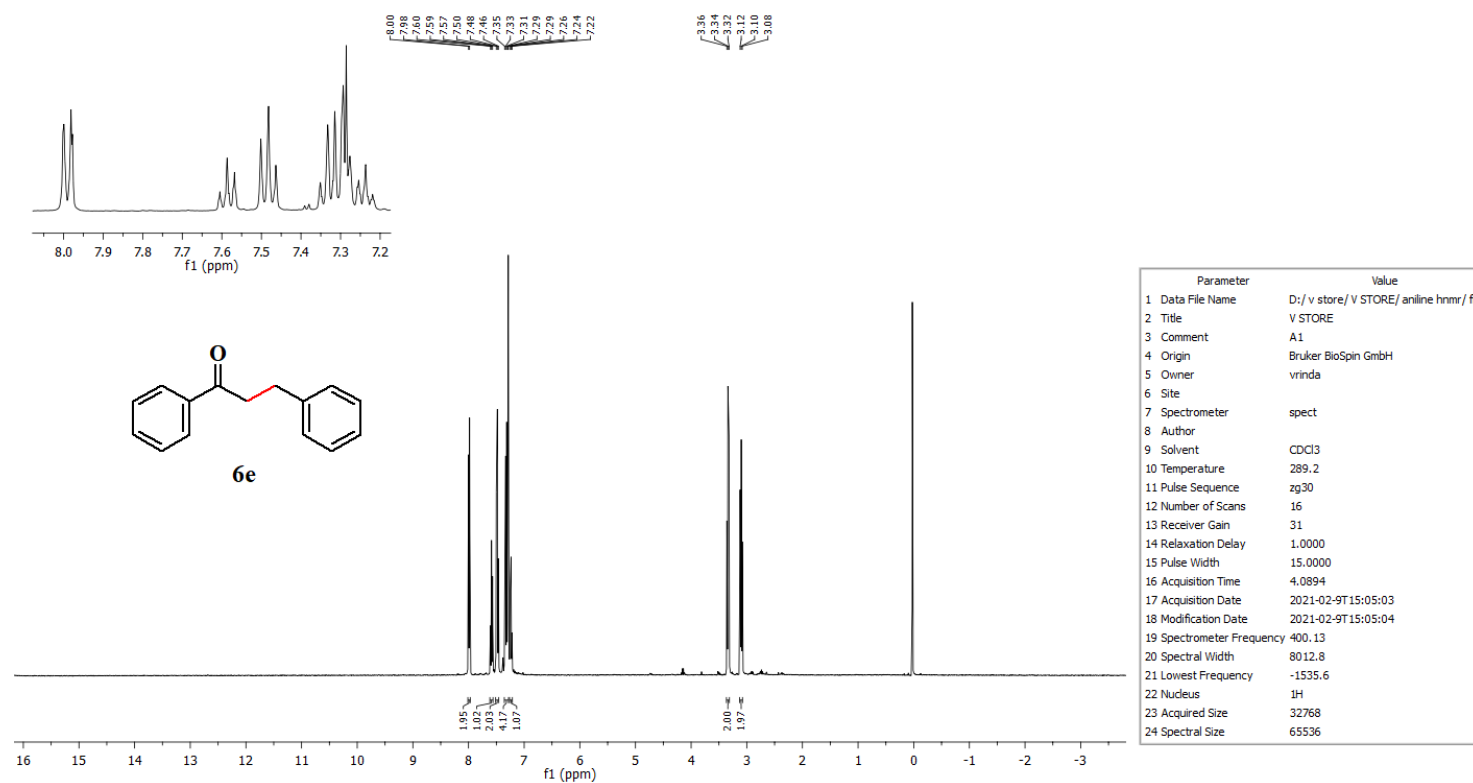

**Figure 29.**  $^1\text{H}$  NMR spectra of 1,3-Diphenylpropan-1-one.

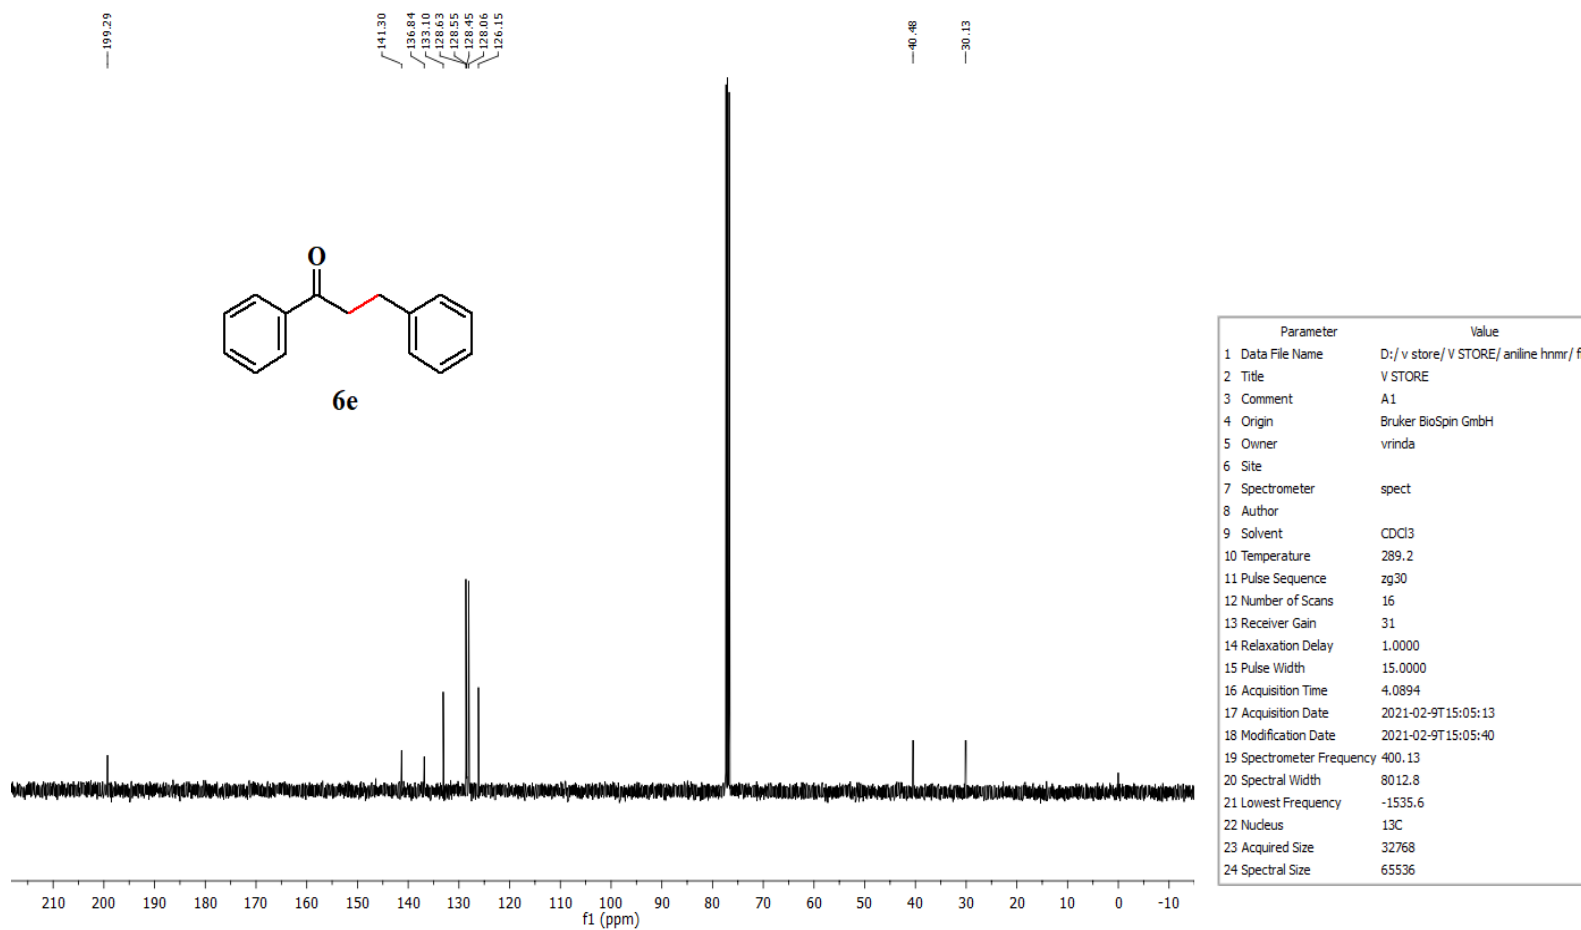

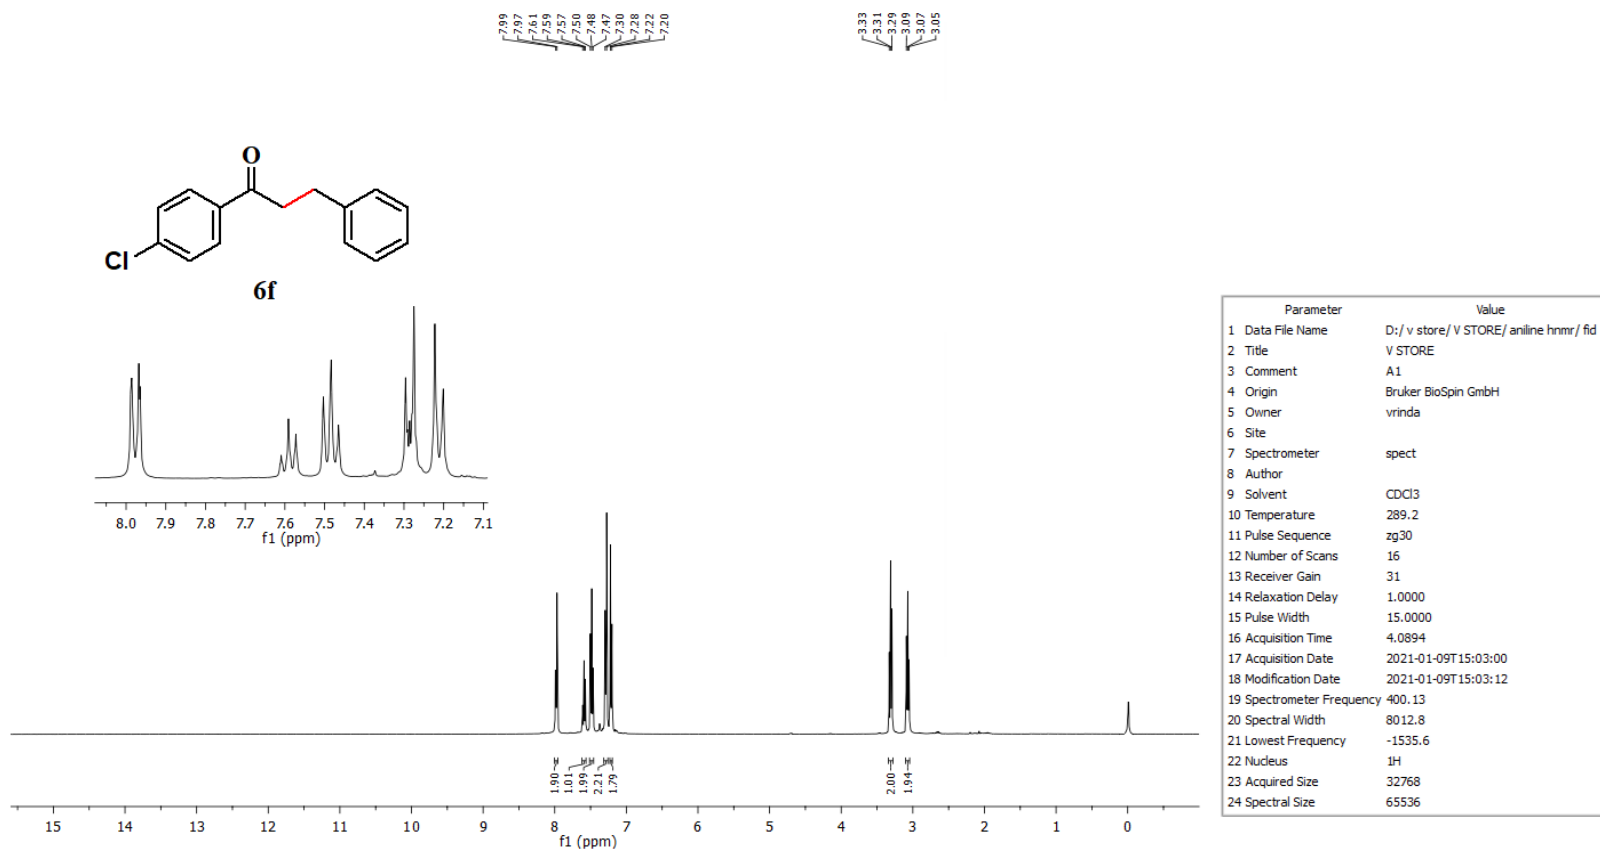

**Figure 31.** <sup>1</sup>H NMR spectra of 3-(4-Chlorophenyl)-1-phenylpropan-1-one.

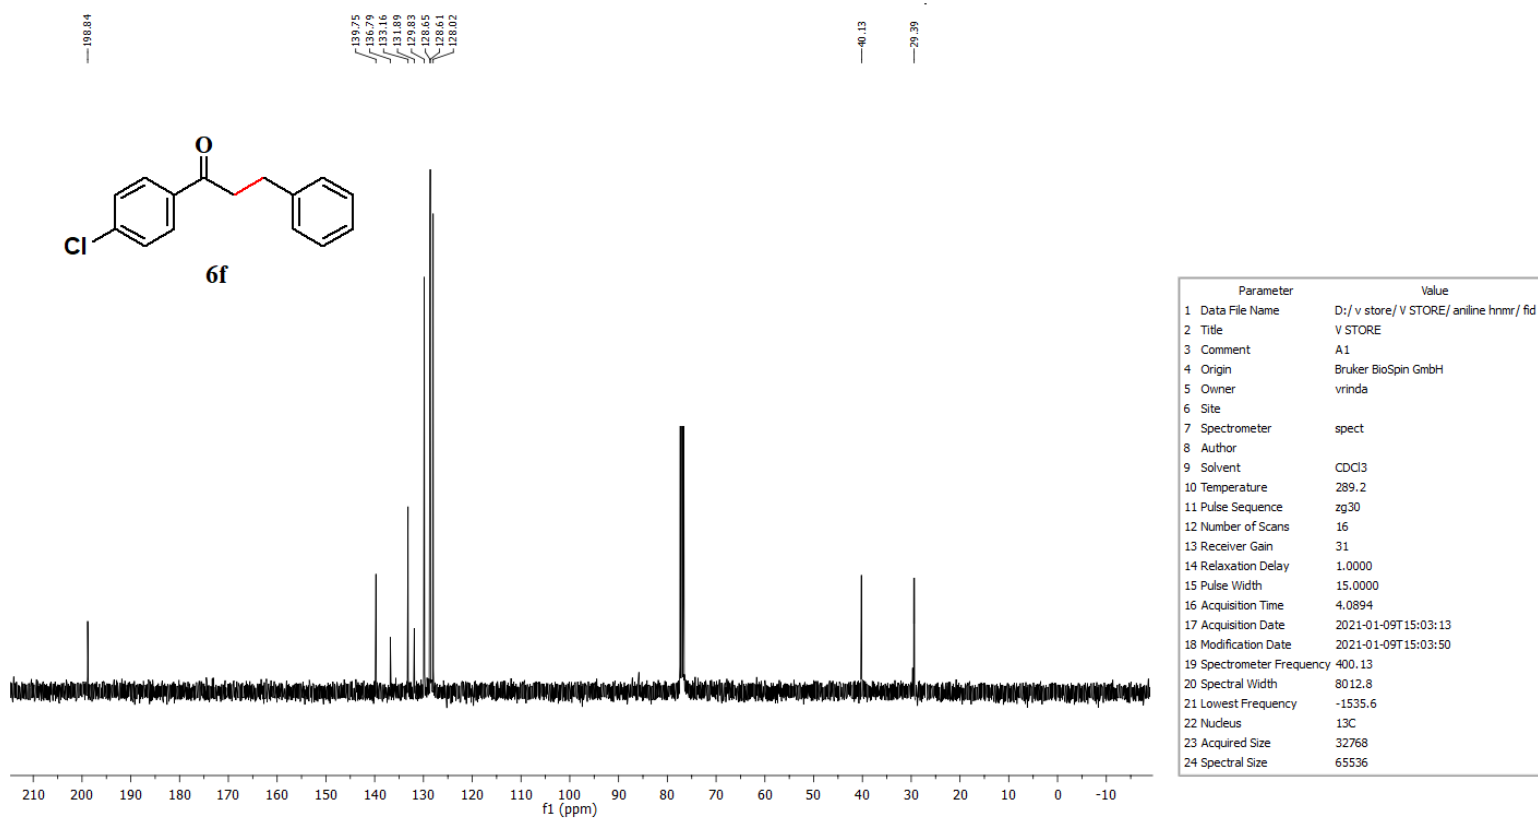

**Figure 32.** <sup>13</sup>C NMR spectra of 3-(4-Chlorophenyl)-1-phenylpropan-1-one
